# Supplementary material for: The Unequal Availability of Rental Housing Information Across Neighborhoods
Source: Oxford University Press journal article supplement (doi:10.1215/00703370-9357518), 2021-07-01
Supplement: besbris_esm.pdf [file besbris_esm.pdf]

## Appendix Contents

|                                                                              |           |
|------------------------------------------------------------------------------|-----------|
| <b>A. Understanding CL Data</b>                                              | <b>2</b>  |
| A-1 Craigslist Market vs Census MSA Definition . . . . .                     | 2         |
| A-2 Data Distribution across MSAs, Tracts, and Neighborhood Types . . . . .  | 3         |
| <b>B. STM Topic Model Robustness Checks</b>                                  | <b>5</b>  |
| B-1 STM Topic Estimation without Covariates . . . . .                        | 5         |
| B-2 STM Topic Estimation with Different Number of Topics . . . . .           | 7         |
| B-3 Unit Description Topic . . . . .                                         | 11        |
| <b>C. Modeling Topic Prevalence Robustness Checks</b>                        | <b>13</b> |
| C-1 Log-transformation of the Dependent Variables . . . . .                  | 13        |
| C-2 Defining Neighborhoods . . . . .                                         | 17        |
| C-2-a Majority v. Plurality . . . . .                                        | 17        |
| C-2-b Diversity . . . . .                                                    | 19        |
| C-2-c Poverty Threshold . . . . .                                            | 23        |
| C-2-d Topic Regressions with Continuous Race and Poverty Variables . . . . . | 25        |
| C-2-e High v Low Rent Units . . . . .                                        | 27        |
| C-2-f Census Tracts v. Zip Codes . . . . .                                   | 30        |
| C-3 Modeling Decisions . . . . .                                             | 32        |
| C-3-a Regression Models Including Price Outliers . . . . .                   | 32        |
| C-3-b Clustering by Census Tract v MSA . . . . .                             | 34        |
| C-3-c Including Month Fixed Effects . . . . .                                | 36        |
| <b>D. MNIR Robustness Checks</b>                                             | <b>38</b> |
| D-1 MNIR Coefficients for Figure 4 . . . . .                                 | 38        |
| D-2 MNIR with Different Preprocessing . . . . .                              | 39        |
| D-3 MNIR Results for Different SES Covariates . . . . .                      | 41        |
| <b>E. Supplemental Analysis</b>                                              | <b>43</b> |
| E-1 Variation in Amount and Types of Information . . . . .                   | 43        |
| <b>F. Appendix References</b>                                                | <b>48</b> |

## **A. Understanding CL Data**

### **A-1 Craigslist Market vs Census MSA Definition**

For most metros, the corresponding Craigslist site closely matches Census MSA definitions. There are a few discrepancies between Craigslist market and Census MSA definitions. Because we only use Census data at the tract level and follow Craigslist market definitions to determine metro area boundaries, any discrepancies do not impact our results. For example, the ‘SFBay’ Craigslist site covers both the San Francisco-Oakland-Hayward, CA MSA and the San Jose-Sunnyvale-Santa Clara, CA MSA. We refer to this site as the San Francisco Bay Area. Similarly, while the Census treats Miami, Fort Lauderdale, and West Palm Beach, FL as one MSA, in May of 2017 when we began data collection, each of these areas had its own Craigslist site. During data collection, Craigslist switched to using just one site, with the Fort Lauderdale and West Palm Beach sites now redirecting to the main Miami site. We combine all unique listings from these three sites and refer to them as the Miami metro area. The Los Angeles Craigslist covers Los Angeles County area rather than Los Angeles-Long Beach-Anaheim MSA, which includes Orange County. Craigslist has a separate site for Orange County, which we do not include as part of our Los Angeles metro area. While these examples demonstrate that Craigslist and Census data do not follow identical definitions of metro areas, in our paper we only use Census data at the tract level, and follow Craigslist market definitions to determine metro area boundaries for our MSA fixed effects, so these discrepancies do not impact our results.

## A-2 Data Distribution across MSAs, Tracts, and Neighborhood Types

Table A1: Number of Listings by MSA

|                                          | MSA   |
|------------------------------------------|-------|
| Atlanta-Sandy Springs-Roswell            | 41974 |
| Austin-Round Rock                        | 29572 |
| Baltimore-Columbia-Towson                | 45833 |
| Birmingham-Hoover                        | 21892 |
| Boston-Cambridge-Newton                  | 18746 |
| Buffalo-Cheektowaga-Niagara Falls        | 22816 |
| Charlotte-Concord-Gastonia               | 44128 |
| Chicago-Naperville-Elgin                 | 27501 |
| Cincinnati                               | 33301 |
| Cleveland-Elyria                         | 25635 |
| Columbus                                 | 36046 |
| Dallas-Fort Worth-Arlington              | 39943 |
| Denver-Aurora-Lakewood                   | 48877 |
| Detroit-Warren-Dearborn                  | 28637 |
| Hartford-West Hartford-East Hartford     | 25035 |
| Houston-The Woodlands-Sugar Land         | 35970 |
| Indianapolis-Carmel-Anderson             | 34631 |
| Jacksonville                             | 34982 |
| Kansas City                              | 23029 |
| Las Vegas-Henderson-Paradise             | 25894 |
| Los Angeles-Long Beach-Anaheim           | 46669 |
| Louisville-Jefferson County              | 29548 |
| Memphis                                  | 25155 |
| Miami-Fort Lauderdale-West Palm Beach    | 50896 |
| Milwaukee-Waukesha-West Allis            | 30336 |
| Minneapolis-St. Paul-Bloomington         | 39494 |
| Nashville-Davidson-Murfreesboro-Franklin | 35577 |
| New Orleans-Metairie                     | 29525 |
| New York-Newark-Jersey City              | 42814 |
| Oklahoma City                            | 26889 |
| Orlando-Kissimmee-Sanford                | 37223 |
| Philadelphia-Camden-Wilmington           | 38382 |
| Phoenix-Mesa-Scottsdale                  | 37176 |
| Pittsburgh                               | 32074 |
| Portland-Vancouver-Hillsboro             | 51815 |
| Providence-Warwick                       | 26694 |
| Raleigh                                  | 46891 |
| Richmond                                 | 38892 |
| Riverside-San Bernardino-Ontario         | 42583 |
| Sacramento-Roseville-Arden-Arcade        | 42214 |
| Salt Lake City                           | 46315 |
| San Antonio-New Braunfels                | 25808 |
| San Diego-Carlsbad                       | 47671 |
| San Francisco-Oakland-Hayward            | 54491 |
| Seattle-Tacoma-Bellevue                  | 52170 |
| St. Louis                                | 32525 |
| Tampa-St. Petersburg-Clearwater          | 36588 |
| Virginia Beach-Norfolk-Newport News      | 35220 |
| Washington-Arlington-Alexandria          | 55669 |

Table A2: Number of listings in Craigslist and number of census tracts in the entire top 50 MSAs per neighborhood type: Plurality, 30% Poverty

| Type           | Number of Listings (%) | Number of Tracts in Top 50 MSAs (%) |
|----------------|------------------------|-------------------------------------|
| White Nonpoor  | 1,196,496<br>(69.73)   | 24,643<br>(64.10)                   |
| White Poor     | 79,115<br>(4.61)       | 976<br>(2.54)                       |
| Black Nonpoor  | 137,838<br>(8.03)      | 3,081<br>(8.01)                     |
| Black Poor     | 77,439<br>(4.51)       | 2,148<br>(5.59)                     |
| Latino Nonpoor | 142,051<br>(8.28)      | 4,755<br>(12.37)                    |
| Latino Poor    | 50,162<br>(2.92)       | 1,734<br>(4.51)                     |
| Asian Nonpoor  | 28,982<br>(1.69)       | 1,011<br>(2.63)                     |
| Asian Poor     | 3,730<br>(0.22)        | 95<br>(0.25)                        |

## B. STM Topic Model Robustness Checks

### B-1 STM Topic Estimation without Covariates

STM is very similar to Latent Dirichlet Allocation (LDA), which is one of the most common forms of topic modeling. However, LDA assumes every document in a corpus is generated in the same way and therefore assumes the frequency of each topic and words likely to be used within each topic are the same across each document (Roberts et al. 2014). STM relaxes these assumptions and is better suited for our analyses since topics and word choices within topics will likely vary across advertisements, not all housing units are the same, and landlords may choose to address different themes in their ads. STM also allows us to include covariates when the model is estimating which words appears in each topic and how frequently each topic occurs in each document.

In this section, we demonstrate that STM estimation results and the regression on the topic proportions from the STM are robust to the selection of covariates included in the STM estimation process. We run an STM that does not include any covariates. Table A3 reports the STM topics from the model without covariates. When we compare Table A3 and Table 1, the top 10 words for each topics are identical. The only difference between Table A3 and Table 1 are the average topic proportions. However, the biggest difference in topic proportions is only 0.3 percentage point (for the neighborhood amenity topic).

Table A4 presents respective regression models to Table 2. We use the topic proportions computed by STM that does not include covariates and run regression models predicting these topic proportions. The results in Table A4 have minimal difference with results from Table 2. When we compare the coefficients from our neighborhood type variables, the biggest difference is 0.006.

Table A3: STM Topics from Craigslist Rental Listings: No Covariate STM

| Label                | Words                                                                          | %    |
|----------------------|--------------------------------------------------------------------------------|------|
| General              | apart, home, communiti, center, pool, call, offer, locat, fit, bedroom         | 24.4 |
| Logistics            | rent, month, applic, will, fee, credit, home, pleas, leas, move                | 10.6 |
| Unit Amenity         | kitchen, floor, center, applianc, room, communiti, loung, fit, stainless, area | 12.7 |
| Unit Description     | bedroom, room, floor, kitchen, new, includ, larg, bath, bathroom, month        | 25.1 |
| Pet Policy           | pet, polici, apart, restrict, offic, now, home, communiti, hous, hour          | 8.1  |
| Neighborhood Amenity | park, apart, locat, downtown, walk, shop, restaur, citi, minut, just           | 10.5 |
| Availability         | avail, apart, leas, price, today, unit, manag, chang, properti, subject        | 8.7  |

Table A4: Regression on Topic Proportions Estimated from STM without Covariates

|                         | <i>Dependent variable:</i> |                             |                                     |
|-------------------------|----------------------------|-----------------------------|-------------------------------------|
|                         | Logistics Topic<br>(1)     | Unit Amenities Topic<br>(2) | Neighborhood Amenities Topic<br>(3) |
| White Poor              | 0.459**<br>(0.075)         | -0.194**<br>(0.073)         | 0.305**<br>(0.084)                  |
| Black Non-poor          | 0.104<br>(0.107)           | -0.097*<br>(0.046)          | -0.009<br>(0.061)                   |
| Black Poor              | 0.436**<br>(0.122)         | -0.175**<br>(0.065)         | 0.173**<br>(0.062)                  |
| Latino Non-poor         | 0.289**<br>(0.082)         | -0.115<br>(0.073)           | 0.206**<br>(0.058)                  |
| Latino Poor             | 0.562**<br>(0.148)         | -0.227**<br>(0.073)         | 0.323**<br>(0.078)                  |
| Asian Non-poor          | 0.242*<br>(0.101)          | -0.027<br>(0.064)           | -0.051<br>(0.092)                   |
| Asian Poor              | 0.726**<br>(0.249)         | -0.249<br>(0.194)           | 0.384**<br>(0.079)                  |
| Price (\$1000)          | -0.112**<br>(0.027)        | 0.341**<br>(0.037)          | 0.016<br>(0.018)                    |
| % College               | -0.009**<br>(0.002)        | 0.011**<br>(0.001)          | 0.011**<br>(0.001)                  |
| % Foreign Born          | -0.015**<br>(0.003)        | 0.004*<br>(0.002)           | -0.008**<br>(0.002)                 |
| % Units Renter Occ      | -0.006**<br>(0.001)        | 0.006**<br>(0.001)          | 0.006**<br>(0.001)                  |
| % Unit Built after 2010 | -0.013*<br>(0.005)         | 0.038**<br>(0.004)          | -0.002<br>(0.002)                   |
| % Vacancy               | 2.377**<br>(0.268)         | -0.655**<br>(0.182)         | 1.122**<br>(0.225)                  |
| Observations            | 1,692,639                  | 1,692,639                   | 1,692,639                           |
| R <sup>2</sup>          | 0.154                      | 0.223                       | 0.176                               |
| Adjusted R <sup>2</sup> | 0.154                      | 0.223                       | 0.176                               |
| Residual Std. Error     | 1.615                      | 1.242                       | 1.047                               |

<sup>+</sup>p<0.1; \*p<0.05; \*\*p<0.01

*Note:* Dependent variables are log transformed. The base category for neighborhood type is White non-poor neighborhoods. Listings that are more expensive than \$10,000 are removed. For neighborhood classification, racial composition is based on the plurality racial group. We use a threshold of 30% of tract poverty rate as our measure of neighborhood poverty. Neighborhood covariates are obtained from 2016 ACS 5-year pooled data. Standard errors are clustered at MSA level.

## **B-2 STM Topic Estimation with Different Number of Topics**

In this section, we demonstrate the topic model results and regression results from STMs that use different numbers of topics. Results from topic models can vary when researchers choose the number of topics. We show that the results from STMs with 5 and 9 topics have similar results to the results from the main text (7 topics). In addition, the results in this section show that STM with 7 topic has more interpretable and cohesive results than 5 or 9 topics.

Table A5 presents the STM results with 5 topics (top 10 frequency words and proportions). The content of the topics is overall similar to the results from STM with 7 topics. However, there are a few topics that are combined together into a single topic. These combined topics are created because the number of topics is not large enough so topics that should be independent are compressed to a single topic. When we compare Table A8 to Table 1 in the main text, the first seven topics are identical to the ones from Table 1. The only differences are the last two topics. These last two topics labelled as apartment 1 and apartment 2 represent generic text from various apartment complexes. These two topics are less coherent than the first seven topics. The STM creates topics that are less interpretable as we increase the number of topics above the ideal number of topic (7).

The regression results reported in Table A7 and Table A8 demonstrate similar results to Table 2. The regression results from STM with 9 topics is more likely to be similar to the models with 7 topics than the results from STM with 5 topics. It is because STM with 9 topics share the same 7 topics as STM with 7 topics and because STM with 5 topics have a few merged topics. The results in Table A7 are similar to Table 2, especially for logistics and unit description topic and unit amenities topic. The regression coefficients for general and neighborhood amenities topic show similar direction as Table 2 but the strength of correlation is weaker than Table 2 because the topic contains a general topic which makes the topic less coherent. The results in Table A8 are very similar to Table 2. In fact, the results for unit amenities topic and neighborhood amenities topic have stronger correlation than Table 2. Altogether, these comparisons support our selection of a model with 7 topics as optimal.

Table A5: STM Topics from Craigslist Rental Listings: STM with 5 Topics

| Label                            | Words                                                                       | %    |
|----------------------------------|-----------------------------------------------------------------------------|------|
| Availability and General         | apart, home, today, call, avail, leas, price, locat, communiti, manag       | 16.0 |
| Logistics and Unit Description   | bedroom, rent, month, room, floor, includ, park, bath, pet, new             | 35.2 |
| Unit Amenity                     | kitchen, park, stainless, applianc, room, steel, center, granit, countertop | 24.3 |
| Pet Policy                       | pet, communiti, apart, home, hour, hous, offic, restrict, now, polici       | 10.0 |
| General and Neighborhood Amenity | apart, center, home, pool, communiti, call, bedroom, closet, fit, park      | 14.6 |

Table A6: STM Topics from Craigslist Rental Listings: STM with 9 Topics

| Label                | Words                                                                                   | %    |
|----------------------|-----------------------------------------------------------------------------------------|------|
| General              | apart, home, communiti, center, pool, call, offer, fit, locat, bedroom                  | 24.4 |
| Logistics            | month, rent, applic, fee, home, will, credit, leas, deposit, move                       | 9.6  |
| Unit Amenity         | kitchen, floor, applianc, center, room, stainless, featur, steel, communiti, countertop | 11.9 |
| Unit Description     | bedroom, room, floor, kitchen, new, larg, includ, bath, bathroom, live                  | 22.0 |
| Pet Policy           | pet, polici, restrict, apart, bath, dog, offic, breed, now, per                         | 7.3  |
| Neighborhood Amenity | apart, park, locat, walk, downtown, build, restaur, shop, citi, street                  | 9.7  |
| Availability         | avail, apart, price, unit, leas, today, chang, properti, subject, special               | 6.9  |
| Apartments           | communiti, park, center, access, hour, pool, fit, amen, apart, creek                    | 4.3  |
| Apartments 2         | beach, bedroom, artnt, pool, unit, view, bay, nth, downtown, rent                       | 3.9  |



Table A7: Regression on Topic Proportions Estimated from STM with 5 Topics

|                         | <i>Dependent variable:</i>           |                      |                              |
|-------------------------|--------------------------------------|----------------------|------------------------------|
|                         | Logistics and Unit Description Topic | Unit Amenities Topic | Neighborhood Amenities Topic |
|                         | (1)                                  | (2)                  | (3)                          |
| White Poor              | 0.670**<br>(0.090)                   | -0.672**<br>(0.065)  | 0.043<br>(0.071)             |
| Black Non-poor          | 0.042<br>(0.102)                     | -0.024<br>(0.064)    | -0.117*<br>(0.052)           |
| Black Poor              | 0.466**<br>(0.125)                   | -0.544**<br>(0.077)  | 0.084<br>(0.058)             |
| Latino Non-poor         | 0.368**<br>(0.070)                   | -0.421**<br>(0.057)  | 0.140*<br>(0.063)            |
| Latino Poor             | 0.736**<br>(0.138)                   | -0.719**<br>(0.082)  | 0.101<br>(0.068)             |
| Asian Non-poor          | 0.216 <sup>+</sup><br>(0.116)        | -0.211**<br>(0.077)  | -0.050<br>(0.067)            |
| Asian Poor              | 0.861**<br>(0.252)                   | -0.702**<br>(0.232)  | -0.108<br>(0.159)            |
| Price (\$1000)          | 0.029<br>(0.031)                     | -0.082**<br>(0.026)  | 0.330**<br>(0.036)           |
| % College               | -0.006**<br>(0.002)                  | -0.002<br>(0.001)    | 0.020**<br>(0.001)           |
| % Foreign Born          | -0.023**<br>(0.004)                  | 0.023**<br>(0.003)   | -0.005*<br>(0.002)           |
| % Units Renter Occ      | -0.009**<br>(0.002)                  | 0.001<br>(0.001)     | 0.008**<br>(0.001)           |
| % Unit Built after 2010 | -0.030**<br>(0.005)                  | -0.008*<br>(0.004)   | 0.039**<br>(0.003)           |
| % Vacancy               | 2.676**<br>(0.275)                   | -3.242**<br>(0.269)  | 0.432**<br>(0.138)           |
| Observations            | 1,692,639                            | 1,692,639            | 1,692,639                    |
| R <sup>2</sup>          | 0.284                                | 0.310                | 0.404                        |
| Adjusted R <sup>2</sup> | 0.284                                | 0.310                | 0.404                        |
| Residual Std. Error     | 1.456                                | 1.149                | 1.039                        |

<sup>+</sup>p<0.1; \*p<0.05; \*\*p<0.01

*Note:* Dependent variables are log transformed. The base category for neighborhood type is White non-poor neighborhoods. Listings that are more expensive than \$10,000 are removed. For neighborhood classification, racial composition is based on the plurality racial group. We use a threshold of 30% of tract poverty rate as our measure of neighborhood poverty. Neighborhood covariates are obtained from 2016 ACS 5-year pooled data. Standard errors are clustered at MSA level.

Table A8: Regression on Topic Proportions Estimated from STM with 9 Topics

|                         | <i>Dependent variable:</i> |                                |                              |
|-------------------------|----------------------------|--------------------------------|------------------------------|
|                         | Logistics Topic            | Unit Amenities Topic           | Neighborhood Amenities Topic |
|                         | (1)                        | (2)                            | (3)                          |
| White Poor              | 0.519**<br>(0.081)         | -0.285**<br>(0.076)            | 0.441**<br>(0.074)           |
| Black Non-poor          | 0.159<br>(0.107)           | -0.172**<br>(0.052)            | -0.003<br>(0.065)            |
| Black Poor              | 0.431**<br>(0.116)         | -0.239**<br>(0.064)            | 0.362**<br>(0.070)           |
| Latino Non-poor         | 0.298**<br>(0.079)         | -0.111<br>(0.070)              | 0.398**<br>(0.058)           |
| Latino Poor             | 0.637**<br>(0.134)         | -0.311**<br>(0.080)            | 0.633**<br>(0.081)           |
| Asian Non-poor          | 0.166<br>(0.107)           | -0.066<br>(0.065)              | -0.092<br>(0.096)            |
| Asian Poor              | 0.702**<br>(0.263)         | -0.447 <sup>+</sup><br>(0.234) | 0.608**<br>(0.075)           |
| Price (\$1000)          | -0.143**<br>(0.024)        | 0.326**<br>(0.034)             | -0.035*<br>(0.016)           |
| % College               | -0.014**<br>(0.002)        | 0.016**<br>(0.001)             | 0.019**<br>(0.001)           |
| % Foreign Born          | -0.016**<br>(0.003)        | 0.005*<br>(0.002)              | -0.011**<br>(0.002)          |
| % Units Renter Occ      | -0.008**<br>(0.001)        | 0.007**<br>(0.001)             | 0.012**<br>(0.001)           |
| % Unit Built after 2010 | -0.014**<br>(0.005)        | 0.046**<br>(0.004)             | -0.011**<br>(0.003)          |
| % Vacancy               | 2.150**<br>(0.286)         | -1.001**<br>(0.186)            | 1.910**<br>(0.204)           |
| Observations            | 1,692,639                  | 1,692,639                      | 1,692,639                    |
| R <sup>2</sup>          | 0.193                      | 0.325                          | 0.447                        |
| Adjusted R <sup>2</sup> | 0.193                      | 0.325                          | 0.447                        |
| Residual Std. Error     | 1.535                      | 1.251                          | 1.001                        |

<sup>+</sup>p<0.1; \*p<0.05; \*\*p<0.01

*Note:* Dependent variables are log transformed. The base category for neighborhood type is White non-poor neighborhoods. Listings that are more expensive than \$10,000 are removed. For neighborhood classification, racial composition is based on the plurality racial group. We use a threshold of 30% of tract poverty rate as our measure of neighborhood poverty. Neighborhood covariates are obtained from 2016 ACS 5-year pooled data. Standard errors are clustered at MSA level.

### B-3 Unit Description Topic

Table A9: Regression Model Predicting Unit Description Topic Proportion

|                         | <i>Dependent variable:</i> |
|-------------------------|----------------------------|
|                         | Unit Description Topic     |
| White Poor              | 0.520**<br>(0.084)         |
| Black Non-poor          | -0.007<br>(0.089)          |
| Black Poor              | 0.354**<br>(0.110)         |
| Latino Non-poor         | 0.225**<br>(0.071)         |
| Latino Poor             | 0.564**<br>(0.118)         |
| Asian Non-poor          | 0.162<br>(0.118)           |
| Asian Poor              | 0.666**<br>(0.200)         |
| Price (\$1000)          | 0.067*<br>(0.032)          |
| % College               | -0.005**<br>(0.002)        |
| % Foreign Born          | -0.017**<br>(0.003)        |
| % Units Renter Occ      | -0.007**<br>(0.001)        |
| % Unit Built after 2010 | -0.021**<br>(0.004)        |
| % Vacancy               | 2.066**<br>(0.270)         |
| Observations            | 1,692,639                  |
| R <sup>2</sup>          | 0.214                      |
| Adjusted R <sup>2</sup> | 0.214                      |
| Residual Std. Error     | 1.403                      |

+p<0.1; \*p<0.05; \*\*p<0.01

*Note:* Dependent variables are log transformed. The base category for neighborhood type is White non-poor neighborhoods. Listings that are more expensive than \$10,000 are removed. For neighborhood classification, racial composition is based on the plurality racial group. We use a threshold of 30% of tract poverty rate as our measure of neighborhood poverty. Neighborhood covariates are obtained from 2016 ACS 5-year pooled data. Standard errors are clustered at MSA level.

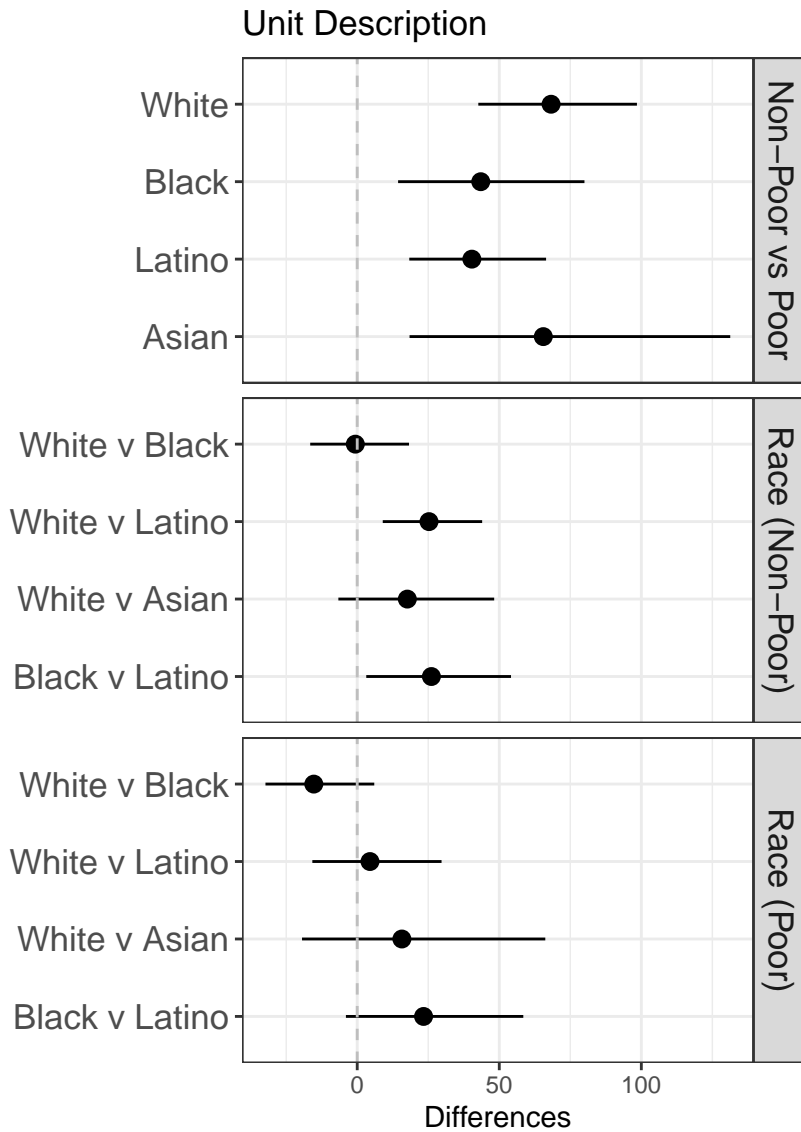

Figure A1: Pairwise Comparison of Unit Description Topic Proportion Across Neighborhood Types. *Note:* The dependent variable is log transformed. The dots and bars indicate the percent change and confidence intervals derived from regression models. For the ease of interpretation, we present percent change instead of regression coefficients. The neighborhood written first (before “vs”) is the base category. The first four rows (non-poor vs poor) display the regression coefficients for poor neighborhoods when the non-poor neighborhoods for the respective racial group is the base category. Negative value means poor neighborhoods have less information than non-poor neighborhoods. Positive value means non-poor neighborhoods have less information than poor neighborhoods. The following eight rows compare differences between different racial compositions. The first racial group is the base category. For example, the coefficient for “White v Latino” in the sixth row for the unit amenities topic indicates that Latino non-poor neighborhoods have 25.3 percent more topic proportions in unit description than White non-poor neighborhoods. Neighborhood racial composition and poverty rate are obtained from 2016 ACS 5-year pooled data. The regression models include MSA fixed effects. Standard errors are clustered at MSA level. Plots are based on results presented in Table A9.

# C. Modeling Topic Prevalence Robustness Checks

## C-1 Log-transformation of the Dependent Variables

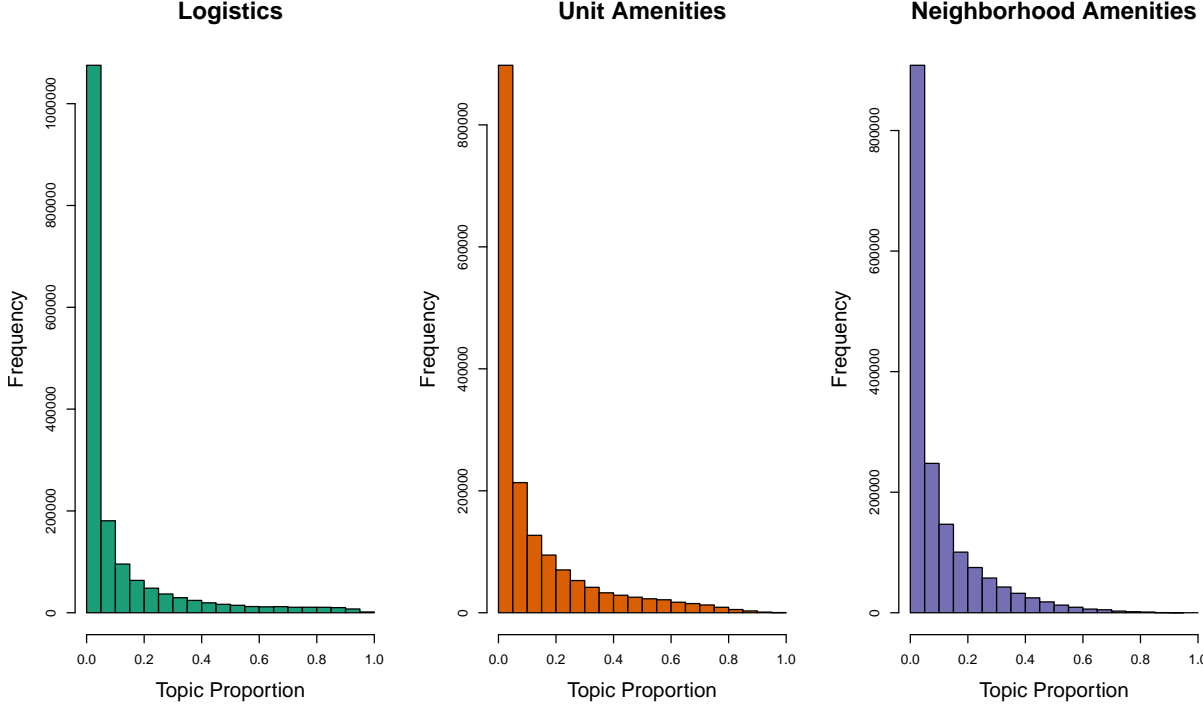

Figure A2: Histogram for Topic Proportions

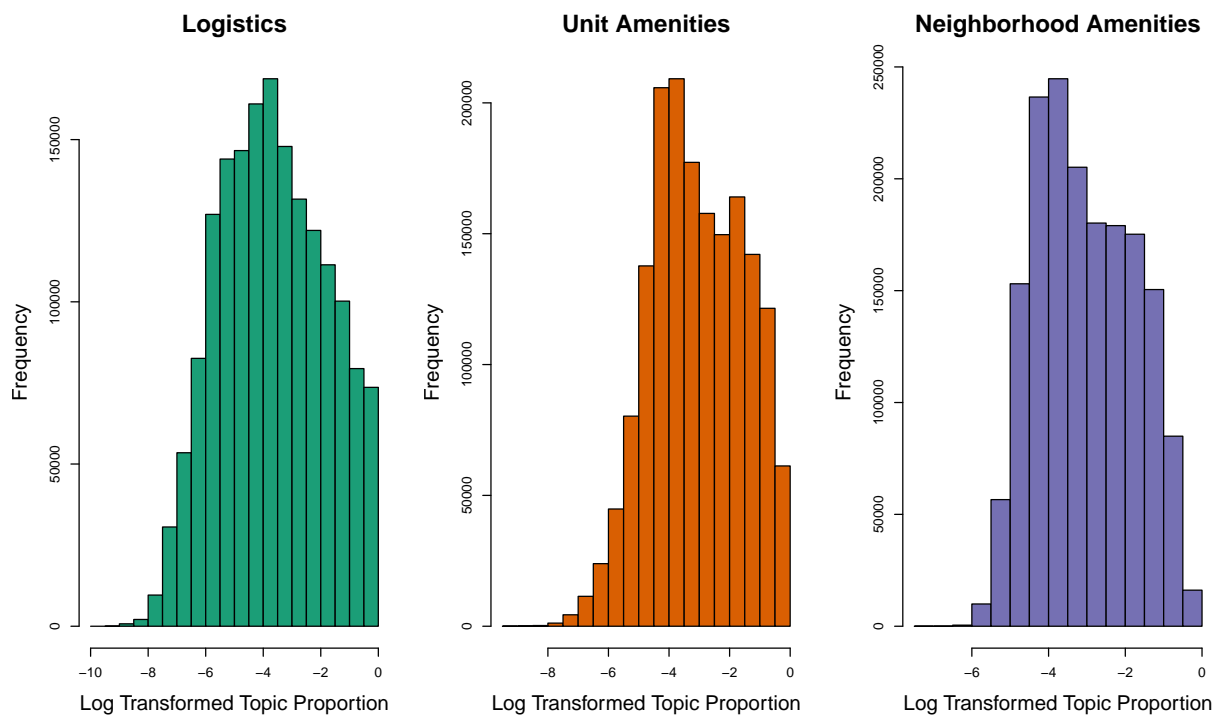

Figure A3: Histogram for Log-Transformed Topic Proportions

Table A10: Topic Proportions without Log Transformation

|                         | <i>Dependent variable:</i> |                               |                                |                      |                              |                      |
|-------------------------|----------------------------|-------------------------------|--------------------------------|----------------------|------------------------------|----------------------|
|                         | Logistics Topic            |                               | Unit Amenities Topic           |                      | Neighborhood Amenities Topic |                      |
|                         | (1)                        | (2)                           | (3)                            | (4)                  | (5)                          | (6)                  |
| White Poor              | 0.021**<br>(0.007)         | 0.028**<br>(0.006)            | -0.013 <sup>+</sup><br>(0.008) | -0.016*<br>(0.007)   | 0.057**<br>(0.012)           | 0.036**<br>(0.011)   |
| Black Non-poor          | 0.038**<br>(0.008)         | 0.014 <sup>+</sup><br>(0.008) | -0.043**<br>(0.006)            | -0.008<br>(0.006)    | -0.024**<br>(0.005)          | 0.001<br>(0.005)     |
| Black Poor              | 0.077**<br>(0.010)         | 0.041**<br>(0.010)            | -0.051**<br>(0.007)            | -0.011<br>(0.007)    | 0.005<br>(0.005)             | 0.016**<br>(0.006)   |
| Latino Non-poor         | 0.037**<br>(0.009)         | 0.023*<br>(0.010)             | -0.043**<br>(0.009)            | -0.003<br>(0.008)    | -0.014*<br>(0.006)           | 0.029**<br>(0.006)   |
| Latino Poor             | 0.063**<br>(0.012)         | 0.046**<br>(0.012)            | -0.059**<br>(0.008)            | -0.007<br>(0.010)    | -0.004<br>(0.007)            | 0.033**<br>(0.008)   |
| Asian Non-poor          | -0.008<br>(0.006)          | 0.009<br>(0.006)              | 0.016*<br>(0.007)              | 0.006<br>(0.009)     | -0.024**<br>(0.008)          | -0.008<br>(0.009)    |
| Asian Poor              | 0.022<br>(0.022)           | 0.041*<br>(0.017)             | -0.027<br>(0.026)              | -0.027<br>(0.018)    | 0.047*<br>(0.019)            | 0.043*<br>(0.017)    |
| Price (\$1000)          |                            | -0.015**<br>(0.003)           |                                | 0.043**<br>(0.005)   |                              | -0.002<br>(0.003)    |
| % College               |                            | -0.001**<br>(0.0001)          |                                | 0.001**<br>(0.0002)  |                              | 0.002**<br>(0.0001)  |
| % Foreign Born          |                            | -0.0005*<br>(0.0002)          |                                | 0.0001<br>(0.0003)   |                              | -0.001**<br>(0.0002) |
| % Units Renter Occ      |                            | -0.001**<br>(0.0001)          |                                | 0.0004**<br>(0.0001) |                              | 0.001**<br>(0.0001)  |
| % Unit Built after 2010 |                            | -0.0002<br>(0.0003)           |                                | 0.007**<br>(0.001)   |                              | -0.0002<br>(0.0003)  |
| % Vacancy               |                            | 0.190**<br>(0.024)            |                                | 0.006<br>(0.025)     |                              | 0.102**<br>(0.023)   |
| Observations            | 1,692,639                  | 1,692,639                     | 1,692,639                      | 1,692,639            | 1,692,639                    | 1,692,639            |
| R <sup>2</sup>          | 0.119                      | 0.149                         | 0.133                          | 0.233                | 0.152                        | 0.230                |
| Adjusted R <sup>2</sup> | 0.119                      | 0.149                         | 0.133                          | 0.233                | 0.151                        | 0.230                |
| Residual Std. Error     | 0.174                      | 0.171                         | 0.165                          | 0.155                | 0.122                        | 0.116                |

<sup>+</sup>p<0.1; \*p<0.05; \*\*p<0.01

*Note:* Dependent variables are topic proportions estimated by STM. The base category for neighborhood type is White non-poor neighborhoods. Listings that are more expensive than \$10,000 are removed. For neighborhood classification, racial composition is based on the plurality racial group. We use a threshold of 30% of tract poverty rate as our measure of neighborhood poverty. Neighborhood covariates are obtained from 2016 ACS 5-year pooled data. Standard errors are clustered at MSA level.

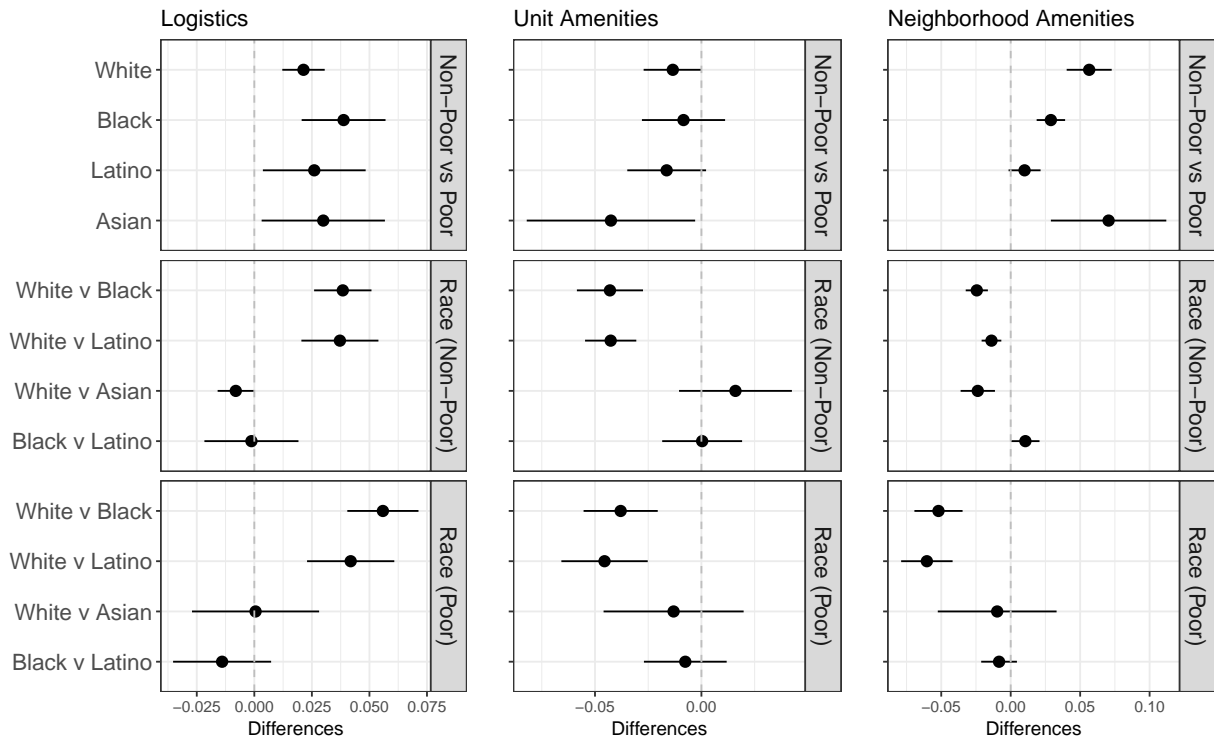

Figure A4: Dependent Variables without Log Transformation: Pairwise Comparison of Topic Proportions Across Neighborhood Types

*Note:* The dependent variables are topic proportions estimated by STM. The dots and bars indicate the percent change and confidence intervals derived from regression models. For the ease of interpretation, we present percent change instead of regression coefficients. The neighborhood written first (before “vs”) is the base category. The first four rows (non-poor vs poor) display the regression coefficients for poor neighborhoods when the non-poor neighborhoods for the respective racial group is the base category. Negative value means poor neighborhoods have less information than non-poor neighborhoods. Positive value means non-poor neighborhoods have less information than poor neighborhoods. The following eight rows compare differences between different racial compositions. The first racial group is the base category. For example, the coefficient for “White v Latino” in the sixth row for the unit amenities topic indicates that Latino non-poor neighborhoods have 0.043 (4.3 percentage point) less topic proportions in unit amenities than White non-poor neighborhoods. Neighborhood racial composition and poverty rate are obtained from 2016 ACS 5-year pooled data. The regression models include MSA fixed effects. Standard errors are clustered at MSA level. Based on Table A10.



## **C-2 Defining Neighborhoods**

In this section, we test whether our regression results are robust to different neighborhood classifications.

### **C-2-a Majority v. Plurality**

We change our classification for neighborhood racial composition. Instead of using plurality to determine the dominant group in each neighborhood, we use majority to classify the dominant group. Census tracts that do not have any majority group are classified as diverse neighborhoods. We use the same poverty rate threshold (16.6%) as Table A14. The overall results reported in Table A11 are similar to Table A14. Black and Latino non-poor neighborhoods show weaker correlations than Table 3. However, poor Black and Latino neighborhoods have stronger correlations than those reported in Table 3 (except for Latino poor neighborhoods for unit amenities topic). Regression coefficients for the neighborhood amenities topic are similar across the three different classification schemes. The new neighborhood types in this regression, diverse neighborhoods, demonstrate a mixed pattern. Diverse poor neighborhoods show the same direction but somewhat smaller magnitudes in terms of regression coefficients compared to Black and Latino poor neighborhoods. They have more logistics and neighborhood amenities topic, but less unit amenities topic than White non-poor neighborhoods. Diverse non-poor neighborhoods have less logistics topic compared White non-poor neighborhoods, although the results for the logistics topic is marginally significant at the 90% confidence level.

Again, overall these comparisons demonstrate robust support for our key conclusion: both neighborhood race and SES structure the types of information available to prospective renters. However, some specific findings are sensitive to our neighborhood racial and poverty composition cut-offs we use.

Table A11: Topic Proportion Regressions – Majority Racial Group and Average Poverty Rate (16.6%)

|                         | <i>Dependent variable:</i>     |                      |                              |
|-------------------------|--------------------------------|----------------------|------------------------------|
|                         | Logistics Topic                | Unit Amenities Topic | Neighborhood Amenities Topic |
|                         | (1)                            | (2)                  | (3)                          |
| White Poor              | 0.423**<br>(0.046)             | -0.203**<br>(0.044)  | 0.194**<br>(0.047)           |
| Black Non-poor          | 0.017<br>(0.214)               | -0.0001<br>(0.177)   | -0.097<br>(0.079)            |
| Black Poor              | 0.654**<br>(0.109)             | -0.355**<br>(0.059)  | 0.203**<br>(0.051)           |
| Latino Non-poor         | 0.196<br>(0.127)               | -0.102<br>(0.080)    | 0.362**<br>(0.084)           |
| Latino Poor             | 0.594**<br>(0.134)             | -0.358**<br>(0.082)  | 0.462**<br>(0.082)           |
| Asian Non-poor          | 0.230<br>(0.157)               | -0.346**<br>(0.098)  | -0.101<br>(0.120)            |
| Asian Poor              | 0.553*<br>(0.264)              | 0.113<br>(0.161)     | 0.495**<br>(0.137)           |
| Diverse Non-poor        | -0.146 <sup>+</sup><br>(0.083) | -0.070<br>(0.064)    | -0.057<br>(0.062)            |
| Diverse Poor            | 0.376**<br>(0.083)             | -0.218**<br>(0.053)  | 0.191**<br>(0.060)           |
| Price (\$1000)          | -0.116**<br>(0.025)            | 0.334**<br>(0.037)   | -0.006<br>(0.017)            |
| % College               | -0.012**<br>(0.002)            | 0.016**<br>(0.001)   | 0.018**<br>(0.001)           |
| % Foreign Born          | -0.015**<br>(0.004)            | 0.005*<br>(0.002)    | -0.010**<br>(0.002)          |
| % Units Renter Occ      | -0.011**<br>(0.001)            | 0.007**<br>(0.001)   | 0.010**<br>(0.001)           |
| % Unit Built after 2010 | -0.011*<br>(0.005)             | 0.047**<br>(0.004)   | -0.003<br>(0.002)            |
| % Vacancy               | 2.459**<br>(0.239)             | -0.816**<br>(0.181)  | 1.596**<br>(0.205)           |
| Observations            | 1,692,639                      | 1,692,639            | 1,692,639                    |
| R <sup>2</sup>          | 0.234                          | 0.351                | 0.344                        |
| Adjusted R <sup>2</sup> | 0.234                          | 0.351                | 0.344                        |
| Residual Std. Error     | 1.606                          | 1.233                | 1.026                        |

<sup>+</sup>p<0.1; \*p<0.05; \*\*p<0.01

*Note:* Dependent variables are log transformed. The base category for neighborhood type is White non-poor neighborhoods. Listings that are more expensive than \$10,000 are removed. For neighborhood classification, racial composition is based on the majority racial group. We use a threshold of 16.6% of tract poverty rate as our measure of neighborhood poverty. Neighborhood covariates are obtained from 2016 ACS 5-year pooled data. Standard errors are clustered at MSA level.

### **C-2-b Diversity**

Next, we test an alternative conceptualization of neighborhood diversity developed by Wright, Holloway, and Ellis (2015). We use 2010 data from their site, `mixedmetro.us`, to test alternative classifications of neighborhood racial/ethnic composition and diversity. First, in Table A12 we categorize neighborhoods based on racial plurality and by diversity (with White and low-diversity neighborhoods as the reference categories), following their definition of diversity. As shown in Table A12, diversity is associated with variation in our key topics. Furthermore, Table A13 demonstrates that when we interact racial plurality with diversity, we can find differences between low and moderately diverse same-race neighborhoods.

However, it is difficult to tell how these results compare to our main models which interact neighborhood race with poverty status. The key question is whether our findings for neighborhood race by poverty status are distinct for diverse neighborhoods. Thus, we next estimate a three-way interaction between neighborhood racial plurality, diversity level, and poverty status. To facilitate interpretation we plot the predicted change between low and moderate diversity neighborhoods by race and poverty status in Figure A5. Our results remain consistent with previous analyses. While neighborhoods with moderate v. low diversity are not identical within racial categories, the results are largely similar; Black and Latino neighborhoods have more language about rental logistics and less about unit amenities in contrast to White neighborhoods; poor non-White neighborhoods remain particularly disadvantaged.

Table A12: Plurality and Diversity of Neighborhoods

|                         | <i>Dependent variable:</i> |                             |                                     |
|-------------------------|----------------------------|-----------------------------|-------------------------------------|
|                         | Logistics Topic<br>(1)     | Unit Amenities Topic<br>(2) | Neighborhood Amenities Topic<br>(3) |
| Black                   | 0.174<br>(0.113)           | -0.176**<br>(0.053)         | -0.036<br>(0.042)                   |
| Latino                  | 0.290**<br>(0.100)         | -0.128<br>(0.084)           | 0.277**<br>(0.049)                  |
| Asian                   | 0.302*<br>(0.145)          | -0.030<br>(0.079)           | 0.021<br>(0.071)                    |
| Moderate Diversity      | -0.111<br>(0.070)          | 0.032<br>(0.035)            | -0.100**<br>(0.029)                 |
| High Diversity          | -0.264*<br>(0.113)         | 0.193*<br>(0.082)           | -0.054<br>(0.064)                   |
| Price (\$1000)          | -0.146**<br>(0.024)        | 0.336**<br>(0.039)          | -0.015<br>(0.012)                   |
| % College               | -0.013**<br>(0.002)        | 0.016**<br>(0.001)          | 0.017**<br>(0.001)                  |
| % Foreign Born          | -0.015**<br>(0.004)        | 0.004*<br>(0.002)           | -0.009**<br>(0.002)                 |
| % Units Renter Occ      | -0.004**<br>(0.001)        | 0.005**<br>(0.001)          | 0.013**<br>(0.001)                  |
| % Unit Built after 2010 | -0.014*<br>(0.007)         | 0.052**<br>(0.005)          | 0.002<br>(0.003)                    |
| % Vacancy               | 2.843**<br>(0.385)         | -1.103**<br>(0.255)         | 1.770**<br>(0.192)                  |
| Observations            | 1,168,994                  | 1,168,994                   | 1,168,994                           |
| R <sup>2</sup>          | 0.216                      | 0.359                       | 0.332                               |
| Adjusted R <sup>2</sup> | 0.216                      | 0.359                       | 0.331                               |
| Residual Std. Error     | 1.581                      | 1.229                       | 1.028                               |

<sup>+</sup>p<0.1; \*p<0.05; \*\*p<0.01

*Note:* Dependent variables are log transformed. The base category for neighborhood type is White neighborhoods for racial composition and low diversity neighborhoods for diversity. Listings that are more expensive than \$10,000 are removed. For neighborhood classification, racial composition is based on the plurality racial group. Diversity classification follows Ellis, Holloway, and Wright (2012). Neighborhood covariates are obtained from 2016 ACS 5-year pooled data. Standard errors are clustered at MSA level.

Table A13: Race  $\times$  Diversity

|                           | <i>Dependent variable:</i> |                    |                      |                    |                              |           |
|---------------------------|----------------------------|--------------------|----------------------|--------------------|------------------------------|-----------|
|                           | Logistics Topic            |                    | Unit Amenities Topic |                    | Neighborhood Amenities Topic |           |
|                           | (1)                        | (2)                | (3)                  | (4)                | (5)                          | (6)       |
| White Moderate Diversity  | -0.149*                    | -0.118             | -0.044               | -0.0004            | -0.001                       | -0.091*   |
|                           | (0.071)                    | (0.078)            | (0.049)              | (0.045)            | (0.058)                      | (0.041)   |
| Black Low Diversity       | 0.969**                    | 0.198              | -1.063**             | -0.253**           | -0.115                       | 0.038     |
|                           | (0.145)                    | (0.156)            | (0.066)              | (0.084)            | (0.081)                      | (0.069)   |
| Black Moderate Diversity  | 0.491**                    | 0.188 <sup>+</sup> | -0.453**             | -0.060             | -0.044                       | -0.0004   |
|                           | (0.109)                    | (0.109)            | (0.086)              | (0.079)            | (0.072)                      | (0.053)   |
| Latino Low Diversity      | 0.363                      | 0.354              | -0.730**             | -0.113             | -0.246 <sup>+</sup>          | 0.444**   |
|                           | (0.239)                    | (0.229)            | (0.224)              | (0.163)            | (0.136)                      | (0.137)   |
| Latino Moderate Diversity | 0.298**                    | 0.171              | -0.536**             | -0.057             | -0.069                       | 0.246**   |
|                           | (0.099)                    | (0.129)            | (0.069)              | (0.086)            | (0.084)                      | (0.075)   |
| Asian Low Diversity       | 0.201                      | 0.554**            | -0.549**             | -0.412**           | -0.200**                     | 0.321**   |
|                           | (0.125)                    | (0.176)            | (0.080)              | (0.087)            | (0.062)                      | (0.107)   |
| Asian Moderate Diversity  | -0.241*                    | 0.139              | 0.035                | -0.065             | -0.063                       | -0.011    |
|                           | (0.099)                    | (0.169)            | (0.075)              | (0.093)            | (0.099)                      | (0.109)   |
| High Diversity            | -0.064                     | -0.122             | -0.235**             | 0.117              | -0.070                       | 0.077     |
|                           | (0.111)                    | (0.135)            | (0.084)              | (0.094)            | (0.085)                      | (0.077)   |
| Price (\$1000)            |                            | -0.149**           |                      | 0.335**            |                              | -0.017    |
|                           |                            | (0.025)            |                      | (0.040)            |                              | (0.018)   |
| % College                 |                            | -0.013**           |                      | 0.017**            |                              | 0.018**   |
|                           |                            | (0.002)            |                      | (0.001)            |                              | (0.001)   |
| % Foreign Born            |                            | -0.014**           |                      | 0.004 <sup>+</sup> |                              | -0.009**  |
|                           |                            | (0.004)            |                      | (0.002)            |                              | (0.003)   |
| % Units Renter Occ        |                            | -0.004**           |                      | 0.005**            |                              | 0.013**   |
|                           |                            | (0.001)            |                      | (0.001)            |                              | (0.001)   |
| % Unit Built after 2010   |                            | -0.014*            |                      | 0.052**            |                              | 0.001     |
|                           |                            | (0.006)            |                      | (0.005)            |                              | (0.003)   |
| % Vacancy                 |                            | 2.747**            |                      | -1.021**           |                              | 1.687**   |
|                           |                            | (0.361)            |                      | (0.264)            |                              | (0.251)   |
| Observations              | 1,168,994                  | 1,168,994          | 1,168,994            | 1,168,994          | 1,168,994                    | 1,168,994 |
| R <sup>2</sup>            | 0.179                      | 0.217              | 0.246                | 0.358              | 0.203                        | 0.332     |
| Adjusted R <sup>2</sup>   | 0.179                      | 0.217              | 0.246                | 0.358              | 0.203                        | 0.332     |
| Residual Std. Error       | 1.618                      | 1.581              | 1.333                | 1.229              | 1.122                        | 1.028     |

<sup>+</sup>p<0.1; \*p<0.05; \*\*p<0.01

*Note:* Dependent variables are log transformed. The base category for neighborhood type is White low diversity neighborhoods. Listings that are more expensive than \$10,000 are removed. For neighborhood classification, racial composition is based on the plurality racial group. Diversity classification follows Ellis, Holloway, and Wright (2012). Neighborhood covariates are obtained from 2016 ACS 5-year pooled data. Standard errors are clustered at MSA level.

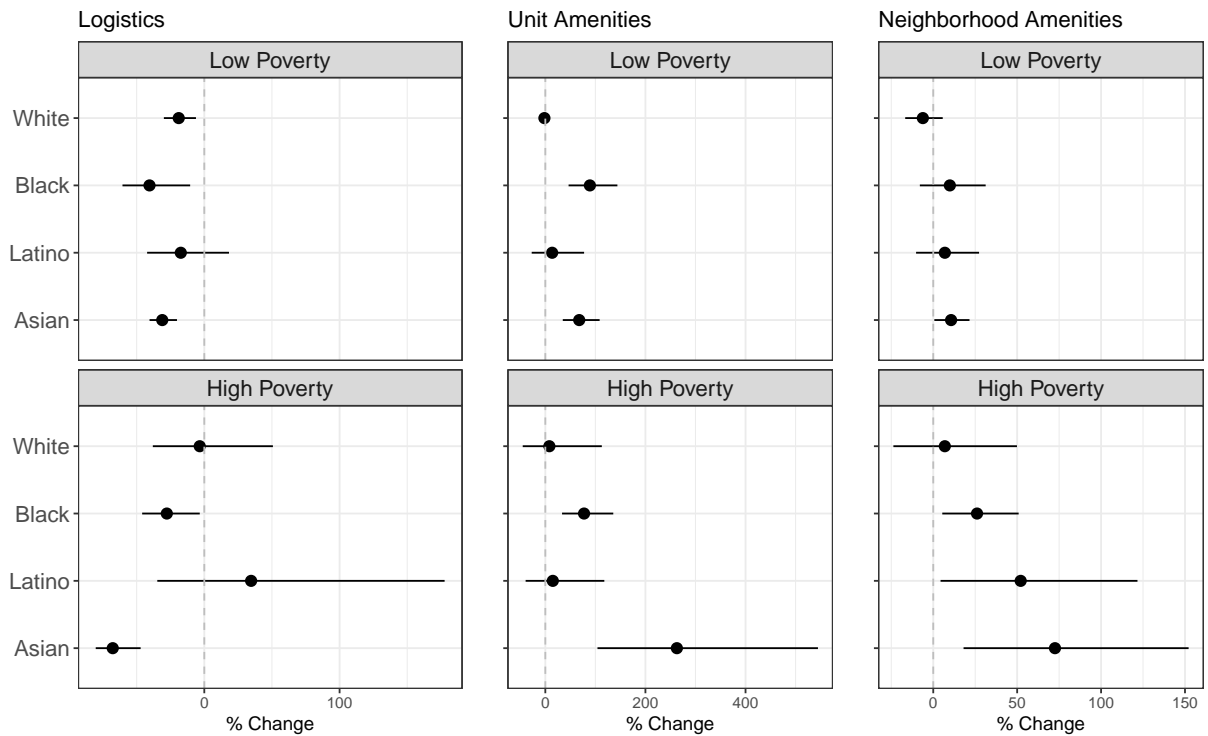

Figure A5: The Change in Topic Proportions When Low Diverse Neighborhoods Become Moderate Diverse Neighborhoods

*Note:* Dependent variables are log transformed. The dots and bars indicate the percent change and confidence intervals derived from regression models. For the ease of interpretation, we present percent change instead of regression coefficients. The first four rows (low poverty) display the percent change in topic proportion for low poverty neighborhoods when low diverse neighborhoods become moderate diverse neighborhoods. Negative value means moderate diversity neighborhoods have less information than low diversity neighborhoods. Positive value means moderate diversity neighborhoods have more information than low diversity neighborhoods. The following four rows compare differences between moderate and low diversity neighborhoods across high poverty neighborhoods. For example, the coefficient for “Black” in the sixth row for the unit amenities topic indicates that Black and high poverty neighborhoods have 77.36 percent more topic proportions in unit amenities when the low diversity neighborhoods become moderate diversity neighborhoods. Neighborhood racial composition and poverty rate are obtained from 2016 ACS 5-year pooled data. The regression models include MSA fixed effects. Standard errors are clustered at MSA level.

### **C-2-c Poverty Threshold**

We test whether changing the poverty rate threshold (set at 30% in the main text) changes the results from the topic proportion regressions in Table A14. We set the average poverty rate, 16.6% as a threshold for classifying poor and non-poor neighborhoods. The direction and the magnitude of the coefficients are substantively similar to Table 3 except for Black non-poor and Latino non-poor neighborhoods. The differences between Table A14 and Table 3 are only pronounced for the logistic topic and unit amenities topic. The regression results for the neighborhood amenities topic in Table A14 is very similar to those from Table 3. The strength of correlations for Black poor neighborhood is stronger than the results reported in Table 3. This comparison demonstrates that our overall findings are robust to the poverty rate threshold we use to classify neighborhoods but that some results are sensitive to the poverty rate threshold.

Table A14: Topic Proportion Regressions – Poverty Rate Threshold: Average Poverty Rate (16.6%)

|                         | <i>Dependent variable:</i>    |                                |                              |
|-------------------------|-------------------------------|--------------------------------|------------------------------|
|                         | Logistics Topic               | Unit Amenities Topic           | Neighborhood Amenities Topic |
|                         | (1)                           | (2)                            | (3)                          |
| White Poor              | 0.437**<br>(0.049)            | -0.190**<br>(0.044)            | 0.201**<br>(0.045)           |
| Black Non-poor          | -0.005<br>(0.200)             | -0.072<br>(0.086)              | -0.104<br>(0.107)            |
| Black Poor              | 0.620**<br>(0.098)            | -0.323**<br>(0.050)            | 0.201**<br>(0.053)           |
| Latino Non-poor         | 0.350**<br>(0.127)            | -0.039<br>(0.094)              | 0.355**<br>(0.063)           |
| Latino Poor             | 0.697**<br>(0.093)            | -0.286**<br>(0.072)            | 0.468**<br>(0.062)           |
| Asian Non-poor          | 0.254 <sup>+</sup><br>(0.130) | -0.161 <sup>+</sup><br>(0.082) | -0.066<br>(0.112)            |
| Asian Poor              | 0.704**<br>(0.221)            | -0.162<br>(0.163)              | 0.264*<br>(0.106)            |
| Price (\$1000)          | -0.114**<br>(0.025)           | 0.336**<br>(0.037)             | -0.005<br>(0.017)            |
| % College               | -0.012**<br>(0.002)           | 0.016**<br>(0.001)             | 0.018**<br>(0.001)           |
| % Foreign Born          | -0.018**<br>(0.004)           | 0.005*<br>(0.002)              | -0.011**<br>(0.002)          |
| % Units Renter Occ      | -0.011**<br>(0.001)           | 0.007**<br>(0.001)             | 0.010**<br>(0.001)           |
| % Unit Built after 2010 | -0.012*<br>(0.005)            | 0.047**<br>(0.004)             | -0.003<br>(0.002)            |
| % Vacancy               | 2.536**<br>(0.244)            | -0.837**<br>(0.178)            | 1.617**<br>(0.208)           |
| Observations            | 1,692,639                     | 1,692,639                      | 1,692,639                    |
| R <sup>2</sup>          | 0.234                         | 0.351                          | 0.345                        |
| Adjusted R <sup>2</sup> | 0.234                         | 0.350                          | 0.345                        |
| Residual Std. Error     | 1.607                         | 1.234                          | 1.026                        |

<sup>+</sup>p<0.1; \*p<0.05; \*\*p<0.01

*Note:* Dependent variables are log transformed. The base category for neighborhood type is White non-poor neighborhoods. Listings that are more expensive than \$10,000 are removed. For neighborhood classification, racial composition is based on the plurality racial group. We use a threshold of 16.6% of tract poverty rate as our measure of neighborhood poverty. Neighborhood covariates are obtained from 2016 ACS 5-year pooled data. Standard errors are clustered at MSA level.



### **C-2-d Topic Regressions with Continuous Race and Poverty Variables**

In this section, we report the results from regressions that include continuous race and poverty variables instead of our neighborhood type variable. Racial composition measures include % Black, % Latino, and % Asian. We do not include % White because of multicollinearity concerns. We add the poverty rate for each census tract to measure the extent of poverty existing in the neighborhood.

We present two models for each outcome variable. First, we report the results from a model that includes the race variables and other covariates, but does not include the poverty rate variable. We show the results from this model because the % Black and % Latino variables are highly correlated with poverty rate. Next, we include every covariate including the poverty rate. The first models show the proportion of logistics topic increases as % Black and % Latino increase. These correlations become weaker when we include the poverty rate variable. The regression coefficient for the poverty rate show a strong correlation between logistic topic proportion and poverty rate. The second models demonstrate the proportion of unit amenities topic decreases as % Black and % Latino increase. Similar to the logistics topic models, including the poverty rate measure weakens the correlations between unit amenities topic proportion and racial composition variables. Contrary to the first and second models, % Black and % Latino show different results in the third model. Specifically, the neighborhood amenities topic proportion increases as % Latino increases and % Asian decreases. The relationship between the proportion of neighborhood amenities topic and % Black is less consistent. There is no statistically significant relationship in the model without the poverty rate variable but the correlation becomes negative when we include the poverty rate variable.

The overall results from Table A15 are similar to Table 2, demonstrating the robustness of our key conclusions. Neighborhoods with higher % Black or % Latino have more logistics topic and less unit amenities topic. There is more neighborhood amenities topic in neighborhoods with a higher % Latino. Higher poverty rate is positively correlated with logistics topic proportion and neighborhood amenities topic proportion, but negatively correlated with unit amenities topic proportion. These results are largely consistent with the results of Table 2.

Table A15: Topic Regressions with Continuous Race and Poverty Variables

|                         | <i>Dependent variable:</i> |                                |                      |                     |                              |                                |
|-------------------------|----------------------------|--------------------------------|----------------------|---------------------|------------------------------|--------------------------------|
|                         | Logistics Topic            |                                | Unit Amenities Topic |                     | Neighborhood Amenities Topic |                                |
|                         | (1)                        | (2)                            | (3)                  | (4)                 | (5)                          | (6)                            |
| % Black                 | 0.003*<br>(0.002)          | -0.0005<br>(0.001)             | -0.003**<br>(0.001)  | -0.001<br>(0.001)   | 0.0001<br>(0.001)            | -0.002 <sup>+</sup><br>(0.001) |
| % Latino                | 0.006**<br>(0.002)         | 0.001<br>(0.002)               | -0.004*<br>(0.002)   | -0.002<br>(0.002)   | 0.007**<br>(0.002)           | 0.004**<br>(0.002)             |
| % Asian                 | -0.008*<br>(0.004)         | -0.012**<br>(0.004)            | -0.002<br>(0.002)    | -0.0005<br>(0.002)  | -0.007*<br>(0.003)           | -0.009**<br>(0.003)            |
| Poverty Rate            |                            | 0.028**<br>(0.003)             |                      | -0.010**<br>(0.002) |                              | 0.015**<br>(0.002)             |
| Price (\$1000)          | -0.114**<br>(0.025)        | -0.122**<br>(0.025)            | 0.334**<br>(0.037)   | 0.337**<br>(0.037)  | -0.006<br>(0.016)            | -0.010<br>(0.017)              |
| % College               | -0.013**<br>(0.002)        | -0.009**<br>(0.002)            | 0.017**<br>(0.001)   | 0.015**<br>(0.001)  | 0.018**<br>(0.001)           | 0.020**<br>(0.001)             |
| % Foreign Born          | -0.012**<br>(0.003)        | -0.009*<br>(0.003)             | 0.006**<br>(0.002)   | 0.004*<br>(0.002)   | -0.008**<br>(0.003)          | -0.006*<br>(0.003)             |
| % Units Renter Occ      | -0.008**<br>(0.001)        | -0.014**<br>(0.002)            | 0.006**<br>(0.001)   | 0.009**<br>(0.001)  | 0.011**<br>(0.001)           | 0.008**<br>(0.001)             |
| % Unit Built after 2010 | -0.012*<br>(0.005)         | -0.010 <sup>+</sup><br>(0.005) | 0.047**<br>(0.004)   | 0.047**<br>(0.004)  | -0.003<br>(0.002)            | -0.002<br>(0.002)              |
| % Vacancy               | 0.030**<br>(0.003)         | 0.022**<br>(0.003)             | -0.010**<br>(0.002)  | -0.007**<br>(0.002) | 0.019**<br>(0.002)           | 0.014**<br>(0.002)             |
| Observations            | 1,692,643                  | 1,692,643                      | 1,692,643            | 1,692,643           | 1,692,643                    | 1,692,643                      |
| R <sup>2</sup>          | 0.226                      | 0.240                          | 0.348                | 0.351               | 0.342                        | 0.350                          |
| Adjusted R <sup>2</sup> | 0.226                      | 0.240                          | 0.348                | 0.351               | 0.342                        | 0.350                          |
| Residual Std. Error     | 1.616                      | 1.601                          | 1.236                | 1.233               | 1.028                        | 1.021                          |

<sup>+</sup>p<0.1; \*p<0.05; \*\*p<0.01

*Note:* Dependent variables are topic proportions estimated by STM. Listings that are more expensive than \$10,000 are removed. Neighborhood covariates are obtained from 2016 ACS 5-year pooled data. Standard errors are clustered at MSA level.

### **C-2-e High v Low Rent Units**

Next we test whether higher and lower priced (asking rent) units display distinct information patterns, even after accounting for neighborhood characteristics. To do so we categorize listings with an asking rent that is higher than the metro median as high rent, all other listings are classified as low rent. Next, we estimate a model interacting neighborhood race with rental price (see Table A16). Interestingly, we find that classifying listings by neighborhood racial composition and high v. low rent produces similar patterns for the logistics and unit amenities topics compared to our neighborhood race by poverty typology. However, a distinct pattern emerges for neighborhood amenities: while we find that neighborhood amenities language is more prevalent in poorer neighborhoods, we find that it is less prevalent among lower-rent listings.

To further explore this finding, we next created a 3-way interaction across neighborhood racial composition, neighborhood poverty status, and listing asking rent (creating 16 distinct neighborhood categories). These results are reported in Figure A6. We find that neighborhood racial composition, poverty status, and rent all contribute to the prevalence of logistics language in advertisements. Rent appears to be strongly tied to the level of logistics language. However, even after accounting for both neighborhood poverty and rent, racial differences remain: among low-poverty neighborhoods, listings in Black and Latino neighborhoods have more logistics language. This is particularly true for listings with lower rents. Additionally, listings in higher poverty neighborhoods tend to have more logistics language regardless of race or rent. Yet the differences between low and high poverty neighborhoods are greatest for Black and Latino neighborhoods. Altogether these patterns highlight how logistics language remains highly racialized.

Somewhat similarly, unit amenities language is more prevalent in higher-rent listings overall, and appears to have a weaker relationship with neighborhood poverty status compared to logistics language. However, once again racial gaps remain even after accounting for rent, such that listings in both poor and non-poor predominantly Black and Latino neighborhoods have less discussion of unit amenities compared to those in White neighborhoods with similar poverty rates.

Finally, in general, advertisements in higher poverty neighborhoods tend to include more discussion of neighborhood amenities compared to their same-race, lower poverty counterparts. Among high poverty neighborhoods, we see gaps both by race (listings in Black and Latino neighborhoods have less neighborhood amenities language compared to White neighborhoods) and by asking rent, with higher-rent units containing more neighborhood amenities language. Among low-poverty neighborhoods, there are only small (and sometimes non-significant) differences in the prevalence of neighborhood amenities language among higher and lower-rent units; racial differences among low-poverty units are also small, though Black neighborhoods have slightly lower levels than all others. We focus on this last set of findings in the main text of the paper.

Table A16: Race × High and Low Rent Units

|                         | <i>Dependent variable:</i> |                     |                      |                     |                              |                     |
|-------------------------|----------------------------|---------------------|----------------------|---------------------|------------------------------|---------------------|
|                         | Logistics Topic            |                     | Unit Amenities Topic |                     | Neighborhood Amenities Topic |                     |
|                         | (1)                        | (2)                 | (3)                  | (4)                 | (5)                          | (6)                 |
| White Low Rent          | 0.435**<br>(0.057)         | 0.279**<br>(0.050)  | -0.736**<br>(0.035)  | -0.500**<br>(0.032) | -0.133**<br>(0.026)          | 0.022<br>(0.023)    |
| Black High Rent         | 0.410**<br>(0.126)         | 0.104<br>(0.122)    | -0.377**<br>(0.090)  | -0.041<br>(0.080)   | -0.133<br>(0.082)            | 0.030<br>(0.072)    |
| Black Low Rent          | 1.039**<br>(0.108)         | 0.534**<br>(0.103)  | -1.261**<br>(0.051)  | -0.685**<br>(0.052) | -0.265**<br>(0.046)          | 0.015<br>(0.052)    |
| Latino High Rent        | 0.433**<br>(0.071)         | 0.428**<br>(0.091)  | -0.402**<br>(0.079)  | -0.082<br>(0.071)   | -0.022<br>(0.071)            | 0.417**<br>(0.063)  |
| Latino Low Rent         | 0.732**<br>(0.100)         | 0.624**<br>(0.104)  | -1.151**<br>(0.067)  | -0.642**<br>(0.074) | -0.222**<br>(0.070)          | 0.303**<br>(0.054)  |
| Asian High Rent         | -0.136<br>(0.104)          | 0.314*<br>(0.125)   | 0.021<br>(0.069)     | -0.132<br>(0.085)   | -0.215**<br>(0.072)          | -0.035<br>(0.081)   |
| Asian Low Rent          | 0.142<br>(0.167)           | 0.523**<br>(0.148)  | -0.595**<br>(0.147)  | -0.608**<br>(0.120) | -0.238**<br>(0.086)          | 0.036<br>(0.099)    |
| % College               |                            | -0.013**<br>(0.002) |                      | 0.017**<br>(0.001)  |                              | 0.017**<br>(0.001)  |
| % Foreign Born          |                            | -0.017**<br>(0.004) |                      | 0.004*<br>(0.002)   |                              | -0.011**<br>(0.002) |
| % Units Renter Occ      |                            | -0.007**<br>(0.001) |                      | 0.006**<br>(0.001)  |                              | 0.012**<br>(0.001)  |
| % Unit Built after 2010 |                            | -0.011*<br>(0.005)  |                      | 0.045**<br>(0.004)  |                              | -0.004+<br>(0.002)  |
| % Vacancy               |                            | 2.876**<br>(0.280)  |                      | -0.840**<br>(0.193) |                              | 1.818**<br>(0.210)  |
| Observations            | 1,692,639                  | 1,692,639           | 1,692,639            | 1,692,639           | 1,692,639                    | 1,692,639           |
| R <sup>2</sup>          | 0.188                      | 0.230               | 0.287                | 0.358               | 0.228                        | 0.341               |
| Adjusted R <sup>2</sup> | 0.188                      | 0.230               | 0.287                | 0.358               | 0.228                        | 0.341               |
| Residual Std. Error     | 1.655                      | 1.611               | 1.292                | 1.227               | 1.113                        | 1.029               |

+p<0.1; \*p<0.05; \*\*p<0.01

*Note:* Topic proportions for the three topics are computed by STM (Roberts et al. 2014). The base category for neighborhood type is White high rent neighborhoods. Listings that are more expensive than \$10,000 are removed. For neighborhood classification, racial composition is based on the plurality racial group. Rental price higher than metro median is classified as high rent units. Neighborhood covariates are obtained from 2016 ACS 5-year pooled data. Standard errors are clustered at MSA level.

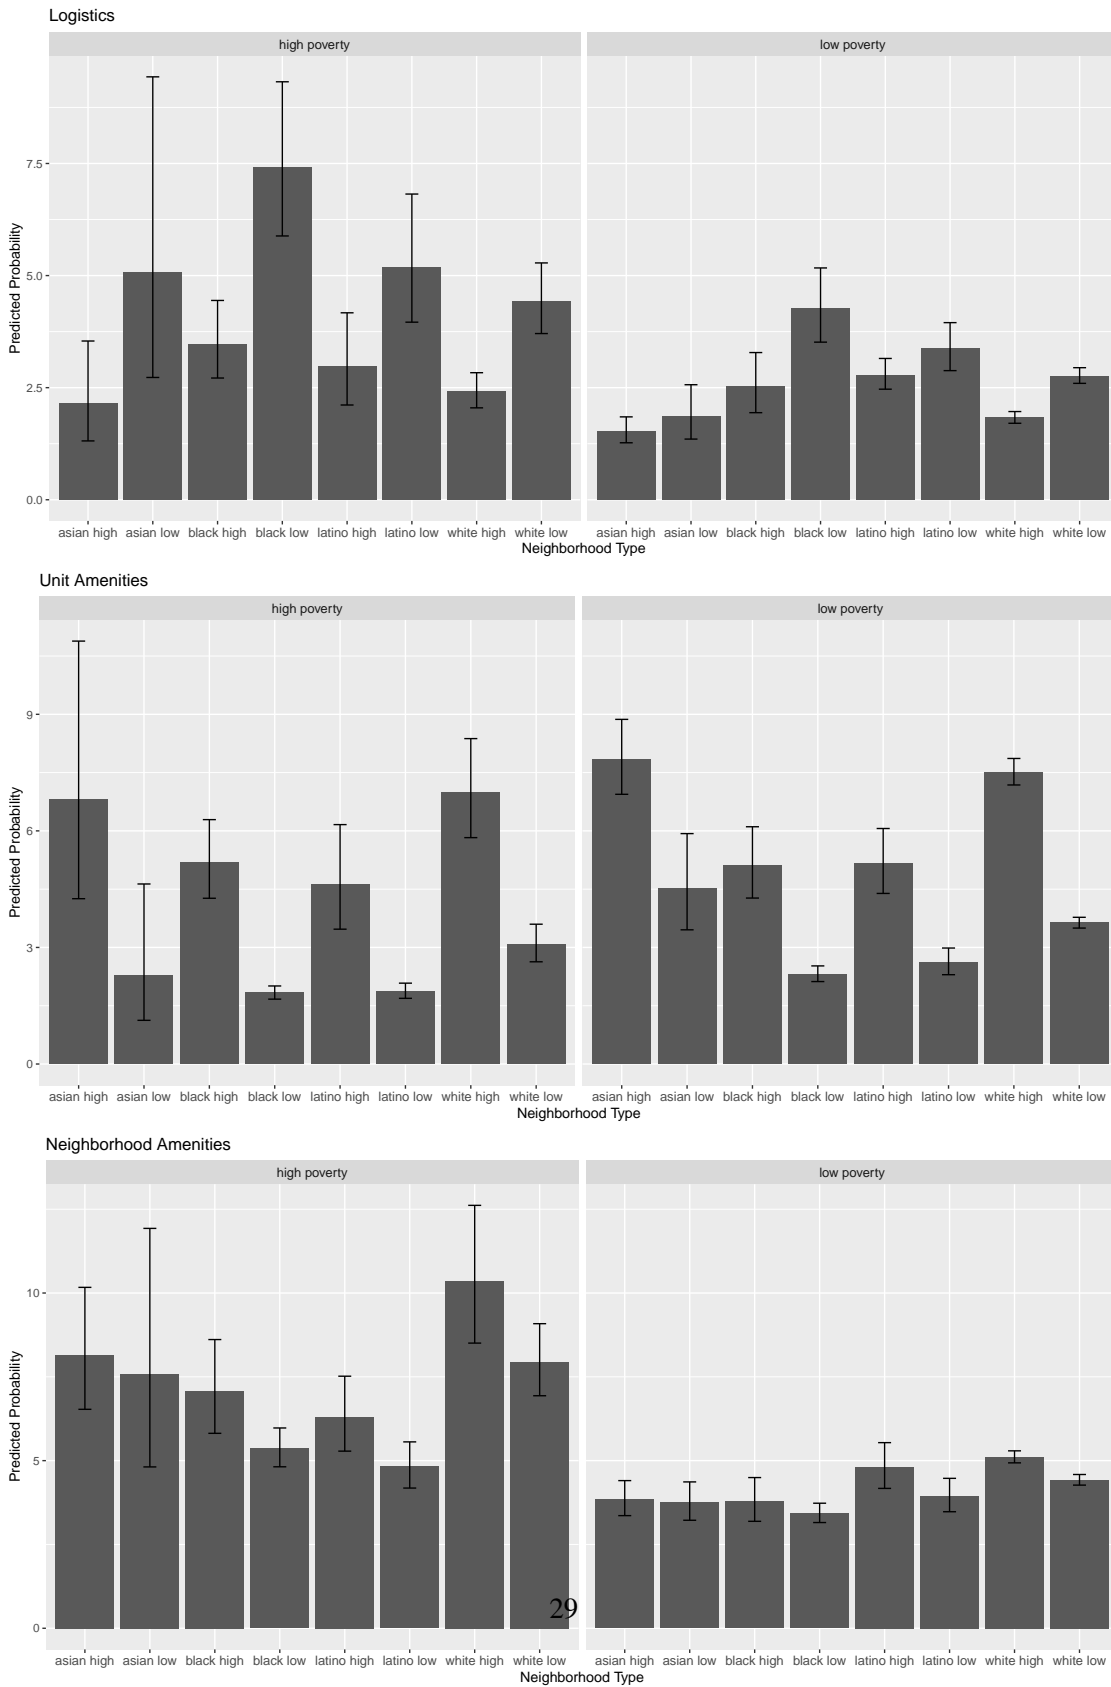

Figure A6: Predicted Probabilities of Topic Proportions across Neighborhood Types (Race × Poverty × High/Low Rents)

### **C-2-f Census Tracts v. Zip Codes**

In this section we test if our results hold at the zip code level rather than using tracts. Zip codes are much larger than tracts and are not ideal for representing neighborhoods; however, because of how Craigslist collects geocoded information from posters, zip codes are less likely to be sensitive to any potential user errors. Because the distribution of poverty across zip codes is distinct from that of tracts, we use a poverty threshold of 15% in these models. While there are some differences when we use zip codes, our key results remain: listing information is highly racialized and also corresponds to zip code poverty rates.

Table A17: Zip Code

|                         | <i>Dependent variable:</i>     |                     |                                |                                |                              |                     |
|-------------------------|--------------------------------|---------------------|--------------------------------|--------------------------------|------------------------------|---------------------|
|                         | Logistics Topic                |                     | Unit Amenities Topic           |                                | Neighborhood Amenities Topic |                     |
|                         | (1)                            | (2)                 | (3)                            | (4)                            | (5)                          | (6)                 |
| White Poor              | 0.501**<br>(0.069)             | 0.440**<br>(0.074)  | -0.223**<br>(0.056)            | -0.156**<br>(0.043)            | 0.413**<br>(0.042)           | 0.219**<br>(0.041)  |
| Black Non-poor          | 0.245<br>(0.280)               | 0.005<br>(0.232)    | -0.483**<br>(0.140)            | -0.144 <sup>+</sup><br>(0.083) | -0.397**<br>(0.066)          | -0.184*<br>(0.081)  |
| Black Poor              | 0.834**<br>(0.122)             | 0.363**<br>(0.115)  | -0.667**<br>(0.078)            | -0.170*<br>(0.069)             | 0.156*<br>(0.062)            | 0.131*<br>(0.060)   |
| Latino Non-poor         | 0.172<br>(0.105)               | 0.170<br>(0.132)    | -0.317*<br>(0.128)             | 0.013<br>(0.121)               | -0.159<br>(0.125)            | 0.295**<br>(0.093)  |
| Latino Poor             | 0.624**<br>(0.067)             | 0.547**<br>(0.091)  | -0.623**<br>(0.077)            | -0.147*<br>(0.067)             | 0.143*<br>(0.066)            | 0.448**<br>(0.075)  |
| Asian Non-poor          | -0.220 <sup>+</sup><br>(0.113) | 0.367*<br>(0.147)   | 0.091<br>(0.111)               | -0.169 <sup>+</sup><br>(0.089) | -0.194**<br>(0.067)          | 0.114<br>(0.077)    |
| Asian Poor              | 0.797**<br>(0.165)             | 1.081**<br>(0.173)  | -0.446 <sup>+</sup><br>(0.253) | -0.352<br>(0.215)              | 0.109<br>(0.130)             | 0.349**<br>(0.079)  |
| Price (\$1000)          |                                | -0.117**<br>(0.025) |                                | 0.345**<br>(0.036)             |                              | 0.015<br>(0.018)    |
| % College               |                                | -0.027**<br>(0.004) |                                | 0.031**<br>(0.003)             |                              | 0.032**<br>(0.002)  |
| % Foreign Born          |                                | -0.025**<br>(0.005) |                                | 0.008**<br>(0.002)             |                              | -0.012**<br>(0.003) |
| % Units Renter Occ      |                                | -0.005*<br>(0.002)  |                                | 0.007**<br>(0.001)             |                              | 0.014**<br>(0.001)  |
| % Unit Built after 2010 |                                | -0.015**<br>(0.005) |                                | 0.040**<br>(0.003)             |                              | -0.005*<br>(0.002)  |
| % Vacancy               |                                | 0.026**<br>(0.005)  |                                | -0.009**<br>(0.003)            |                              | 0.017**<br>(0.003)  |
| Observations            | 1,690,982                      | 1,690,982           | 1,690,982                      | 1,690,982                      | 1,690,982                    | 1,690,982           |
| R <sup>2</sup>          | 0.184                          | 0.225               | 0.226                          | 0.342                          | 0.243                        | 0.331               |
| Adjusted R <sup>2</sup> | 0.184                          | 0.225               | 0.226                          | 0.342                          | 0.243                        | 0.331               |
| Residual Std. Error     | 1.659                          | 1.616               | 1.347                          | 1.241                          | 1.103                        | 1.036               |

<sup>+</sup>p<0.1; \*p<0.05; \*\*p<0.01

*Note:* Dependent variables are log transformed. The base category for neighborhood type is White non-poor neighborhoods. Listings that are more expensive than \$10,000 are removed. For neighborhood classification, racial composition is based on the plurality racial group. We use a threshold of 15% of zip code poverty rate as our measure of neighborhood poverty. Neighborhood covariates are obtained from 2016 ACS 5-year pooled data. Standard errors are clustered at MSA level.

### **C-3 Modeling Decisions**

#### **C-3-a Regression Models Including Price Outliers**

In this section, we show that our results are robust to the decision to remove listings with a posted price higher than \$10,000. When we include these listings we find minimal differences in the results from the regression models reported in the main text.



Table A18: Including Listings Priced Higher than \$10,000

|                         | <i>Dependent variable:</i> |                        |                              |
|-------------------------|----------------------------|------------------------|------------------------------|
|                         | Logistics Topic            | Unit Amenities Topic   | Neighborhood Amenities Topic |
|                         | (1)                        | (2)                    | (3)                          |
| White Poor              | 0.519**<br>(0.084)         | -0.232**<br>(0.080)    | 0.382**<br>(0.075)           |
| Black Non-poor          | 0.193+<br>(0.104)          | -0.164**<br>(0.052)    | -0.037<br>(0.061)            |
| Black Poor              | 0.491**<br>(0.123)         | -0.223**<br>(0.066)    | 0.281**<br>(0.064)           |
| Latino Non-poor         | 0.360**<br>(0.085)         | -0.093<br>(0.076)      | 0.346**<br>(0.055)           |
| Latino Poor             | 0.664**<br>(0.150)         | -0.304**<br>(0.081)    | 0.477**<br>(0.076)           |
| Asian Non-poor          | 0.250*<br>(0.115)          | -0.127+<br>(0.066)     | -0.055<br>(0.092)            |
| Asian Poor              | 0.800**<br>(0.276)         | -0.380<br>(0.234)      | 0.440**<br>(0.078)           |
| Price (\$1000)          | 0.00000<br>(0.00000)       | 0.00000**<br>(0.00000) | 0.00000*<br>(0.00000)        |
| % College               | -0.015**<br>(0.002)        | 0.020**<br>(0.001)     | 0.018**<br>(0.001)           |
| % Foreign Born          | -0.017**<br>(0.004)        | 0.004*<br>(0.002)      | -0.010**<br>(0.002)          |
| % Units Renter Occ      | -0.009**<br>(0.001)        | 0.006**<br>(0.001)     | 0.010**<br>(0.001)           |
| % Unit Built after 2010 | -0.014**<br>(0.005)        | 0.050**<br>(0.004)     | -0.004<br>(0.002)            |
| % Vacancy               | 2.653**<br>(0.273)         | -0.788**<br>(0.209)    | 1.589**<br>(0.212)           |
| Observations            | 1,695,948                  | 1,695,948              | 1,695,948                    |
| R <sup>2</sup>          | 0.229                      | 0.333                  | 0.346                        |
| Adjusted R <sup>2</sup> | 0.229                      | 0.333                  | 0.346                        |
| Residual Std. Error     | 1.613                      | 1.250                  | 1.025                        |

+p&lt;0.1; \*p&lt;0.05; \*\*p&lt;0.01

*Note:* Dependent variables are log transformed. The base category for neighborhood type is White non-poor neighborhoods. For neighborhood classification, racial composition is based on the plurality racial group. We use a threshold of 30% of tract poverty rate as our measure of neighborhood poverty. Neighborhood covariates are obtained from 2016 ACS 5-year pooled data. Standard errors are clustered at MSA level.

### **C-3-b Clustering by Census Tract v MSA**

Because our models include MSA fixed effects, we cluster standard errors by MSA. However, because the correlation among advertisements within tracts is greater than the correlation within MSAs, we also estimate models clustering standard errors by tract. The results are substantively unchanged. Some standard errors are slightly larger and some are slightly smaller.

Table A19: Clustering by Census Tract

|                                         | <i>Dependent variable: Log Transformed Topic Proportion</i> |                     |                      |                     |                              |                     |
|-----------------------------------------|-------------------------------------------------------------|---------------------|----------------------|---------------------|------------------------------|---------------------|
|                                         | Logistics Topic                                             |                     | Unit Amenities Topic |                     | Neighborhood Amenities Topic |                     |
|                                         | (1a)                                                        | (1b)                | (2a)                 | (2b)                | (3a)                         | (3b)                |
| <b>Neighborhood Type</b>                |                                                             |                     |                      |                     |                              |                     |
| White Poor                              | 0.436**<br>(0.075)                                          | 0.520**<br>(0.076)  | -0.215**<br>(0.075)  | -0.234**<br>(0.069) | 0.620**<br>(0.058)           | 0.382**<br>(0.052)  |
| Black Non-poor                          | 0.487**<br>(0.083)                                          | 0.195*<br>(0.082)   | -0.594**<br>(0.060)  | -0.164**<br>(0.055) | -0.304**<br>(0.048)          | -0.036<br>(0.045)   |
| Black Poor                              | 0.995**<br>(0.085)                                          | 0.497**<br>(0.090)  | -0.792**<br>(0.062)  | -0.239**<br>(0.055) | 0.193**<br>(0.044)           | 0.280**<br>(0.044)  |
| Latino Non-poor                         | 0.364**<br>(0.061)                                          | 0.362**<br>(0.077)  | -0.490**<br>(0.048)  | -0.095+<br>(0.052)  | -0.124**<br>(0.038)          | 0.347**<br>(0.042)  |
| Latino Poor                             | 0.706**<br>(0.099)                                          | 0.664**<br>(0.109)  | -0.822**<br>(0.071)  | -0.305**<br>(0.071) | 0.080<br>(0.056)             | 0.478**<br>(0.062)  |
| Asian Non-poor                          | -0.270**<br>(0.089)                                         | 0.236*<br>(0.099)   | 0.112<br>(0.083)     | -0.081<br>(0.077)   | -0.232**<br>(0.056)          | -0.057<br>(0.072)   |
| Asian Poor                              | 0.389+<br>(0.216)                                           | 0.802**<br>(0.205)  | -0.303+<br>(0.179)   | -0.393**<br>(0.125) | 0.494**<br>(0.144)           | 0.439**<br>(0.081)  |
| <b>Unit and Neighborhood Covariates</b> |                                                             |                     |                      |                     |                              |                     |
| Price (\$1000)                          |                                                             | -0.114**<br>(0.014) |                      | 0.336**<br>(0.011)  |                              | -0.005<br>(0.009)   |
| % College                               |                                                             | -0.013**<br>(0.001) |                      | 0.017**<br>(0.001)  |                              | 0.018**<br>(0.001)  |
| % Foreign Born                          |                                                             | -0.017**<br>(0.002) |                      | 0.004**<br>(0.001)  |                              | -0.010**<br>(0.002) |
| % Units Renter Occ                      |                                                             | -0.009**<br>(0.001) |                      | 0.007**<br>(0.001)  |                              | 0.010**<br>(0.001)  |
| % Unit Built after 2010                 |                                                             | -0.013**<br>(0.003) |                      | 0.047**<br>(0.002)  |                              | -0.004+<br>(0.002)  |
| % Vacancy                               |                                                             | 2.691**<br>(0.233)  |                      | -0.911**<br>(0.166) |                              | 1.592**<br>(0.139)  |
| MSA Fixed Effects                       | Y                                                           | Y                   | Y                    | Y                   | Y                            | Y                   |
| Observations                            | 1,692,639                                                   | 1,692,639           | 1,692,639            | 1,692,639           | 1,692,639                    | 1,692,639           |
| Number of Census Tracts                 | 37,319                                                      | 37,319              | 37,319               | 37,319              | 37,319                       | 37,319              |
| R <sup>2</sup>                          | 0.179                                                       | 0.230               | 0.231                | 0.349               | 0.241                        | 0.346               |
| Adjusted R <sup>2</sup>                 | 0.179                                                       | 0.230               | 0.231                | 0.349               | 0.241                        | 0.346               |
| Residual Std. Error                     | 1.664                                                       | 1.611               | 1.342                | 1.235               | 1.104                        | 1.025               |

+p<0.1; \*p<0.05; \*\*p<0.01

Note: Topic proportions for the three topics are computed by STM (Roberts et al. 2014). Dependent variables are log transformed. The base category for neighborhood type is White non-poor neighborhoods. Listings that are more expensive than \$10,000 are removed. For neighborhood classification, racial composition is based on the plurality racial group. We use a threshold of 30% of tract poverty rate as our measure of neighborhood poverty. Neighborhood covariates are obtained from 2016 ACS 5-year pooled data. Standard errors are clustered at census tract level.

### **C-3-c Including Month Fixed Effects**

Given the potential for seasonality effects in the rental market, we also estimate models with month fixed effects. Results are unchanged.

Table A20: Month Fixed Effects

|                         | <i>Dependent variable:</i> |                     |                      |                     |                              |                     |
|-------------------------|----------------------------|---------------------|----------------------|---------------------|------------------------------|---------------------|
|                         | Logistics Topic            |                     | Unit Amenities Topic |                     | Neighborhood Amenities Topic |                     |
|                         | (1)                        | (2)                 | (3)                  | (4)                 | (5)                          | (6)                 |
| White Poor              | 0.433**<br>(0.088)         | 0.517**<br>(0.084)  | -0.213*<br>(0.093)   | -0.231**<br>(0.078) | 0.620**<br>(0.084)           | 0.382**<br>(0.075)  |
| Black Non-poor          | 0.488**<br>(0.105)         | 0.195+<br>(0.104)   | -0.595**<br>(0.052)  | -0.165**<br>(0.051) | -0.304**<br>(0.054)          | -0.036<br>(0.061)   |
| Black Poor              | 0.992**<br>(0.112)         | 0.493**<br>(0.122)  | -0.789**<br>(0.063)  | -0.235**<br>(0.066) | 0.193**<br>(0.064)           | 0.280**<br>(0.063)  |
| Latino Non-poor         | 0.364**<br>(0.065)         | 0.360**<br>(0.084)  | -0.490**<br>(0.081)  | -0.093<br>(0.072)   | -0.124+<br>(0.072)           | 0.347**<br>(0.055)  |
| Latino Poor             | 0.704**<br>(0.140)         | 0.661**<br>(0.148)  | -0.820**<br>(0.078)  | -0.302**<br>(0.079) | 0.080<br>(0.074)             | 0.477**<br>(0.076)  |
| Asian Non-poor          | -0.266*<br>(0.109)         | 0.239*<br>(0.114)   | 0.108+<br>(0.058)    | -0.083<br>(0.065)   | -0.232**<br>(0.065)          | -0.057<br>(0.092)   |
| Asian Poor              | 0.379<br>(0.286)           | 0.792**<br>(0.267)  | -0.293<br>(0.315)    | -0.381+<br>(0.215)  | 0.493**<br>(0.159)           | 0.438**<br>(0.077)  |
| Price (\$1000)          |                            | -0.114**<br>(0.026) |                      | 0.337**<br>(0.037)  |                              | -0.005<br>(0.016)   |
| % College               |                            | -0.013**<br>(0.002) |                      | 0.017**<br>(0.001)  |                              | 0.018**<br>(0.001)  |
| % Foreign Born          |                            | -0.017**<br>(0.004) |                      | 0.004*<br>(0.002)   |                              | -0.010**<br>(0.002) |
| % Units Renter Occ      |                            | -0.009**<br>(0.001) |                      | 0.007**<br>(0.001)  |                              | 0.010**<br>(0.001)  |
| % Unit Built after 2010 |                            | -0.013*<br>(0.005)  |                      | 0.047**<br>(0.004)  |                              | -0.004<br>(0.002)   |
| % Vacancy               |                            | 2.684**<br>(0.269)  |                      | -0.904**<br>(0.191) |                              | 1.592**<br>(0.212)  |
| MSA Fixed Effects       | Y                          | Y                   | Y                    | Y                   | Y                            | Y                   |
| Month Fixed Effects     | Y                          | Y                   | Y                    | Y                   | Y                            | Y                   |
| Observations            | 1,692,635                  | 1,692,635           | 1,692,635            | 1,692,635           | 1,692,635                    | 1,692,635           |
| R <sup>2</sup>          | 0.180                      | 0.231               | 0.233                | 0.351               | 0.241                        | 0.346               |
| Adjusted R <sup>2</sup> | 0.180                      | 0.231               | 0.233                | 0.351               | 0.241                        | 0.346               |
| Residual Std. Error     | 1.662                      | 1.610               | 1.341                | 1.233               | 1.104                        | 1.025               |

+p&lt;0.1; \*p&lt;0.05; \*\*p&lt;0.01

*Note:* Dependent variables are log transformed. The base category for neighborhood type is White non-poor neighborhoods. For neighborhood classification, racial composition is based on the plurality racial group. We use a threshold of 30% of tract poverty rate as our measure of neighborhood poverty. Neighborhood covariates are obtained from 2016 ACS 5-year pooled data. Models include MSA and month fixed effects. Standard errors are clustered at MSA level.

## D. MNIR Robustness Checks

### D-1 MNIR Coefficients for Figure 4

Table A21: MNIR Coefficients for Figure 4

|    | % Black       |              | % Poverty   |              | % Education   |              |
|----|---------------|--------------|-------------|--------------|---------------|--------------|
|    | Words         | Coefficients | Words       | Coefficients | Words         | Coefficients |
| 1  | evictions     | 0.0196       | campus      | 0.0543       | foods         | 0.0450       |
| 2  | section       | 0.0195       | students    | 0.0432       | rooftop       | 0.0382       |
| 3  | polis         | 0.0151       | exposed     | 0.0369       | uptown        | 0.0326       |
| 4  | applicants    | 0.0147       | evictions   | 0.0358       | lobby         | 0.0317       |
| 5  | eat           | 0.0146       | university  | 0.0351       | conciierge    | 0.0316       |
| 6  | brick         | 0.0135       | lofts       | 0.0303       | boutique      | 0.0301       |
| 7  | ups           | 0.0134       | museum      | 0.0286       | rise          | 0.0300       |
| 8  | train         | 0.0133       | section     | 0.0280       | bicycle       | 0.0297       |
| 9  | exposed       | 0.0133       | historic    | 0.0274       | midtown       | 0.0292       |
| 10 | hook          | 0.0132       | august      | 0.0272       | union         | 0.0278       |
| 11 | needed        | 0.0131       | studios     | 0.0270       | whole         | 0.0268       |
| 12 | hookup        | 0.0131       | midtown     | 0.0270       | marble        | 0.0265       |
| 13 | clothes       | 0.0129       | proof       | 0.0259       | red           | 0.0247       |
| 14 | discounts     | 0.0128       | duplex      | 0.0255       | nw            | 0.0246       |
| 15 | affordable    | 0.0127       | brick       | 0.0250       | subway        | 0.0244       |
| 16 | wall          | 0.0127       | secured     | 0.0245       | museum        | 0.0239       |
| 17 | perfectly     | 0.0127       | ave         | 0.0241       | nightlife     | 0.0239       |
| 18 | criminal      | 0.0125       | needed      | 0.0235       | elevator      | 0.0238       |
| 19 | proof         | 0.0122       | study       | 0.0234       | backsplashes  | 0.0237       |
| 20 | de            | 0.0120       | original    | 0.0230       | hill          | 0.0235       |
| 21 | money         | 0.0119       | criminal    | 0.0227       | bike          | 0.0233       |
| 22 | military      | 0.0118       | arts        | 0.0224       | streets       | 0.0233       |
| 23 | income        | 0.0116       | applicants  | 0.0221       | broker        | 0.0231       |
| 24 | hospital      | 0.0115       | recently    | 0.0218       | underground   | 0.0231       |
| 25 | porch         | 0.0115       | sky         | 0.0218       | skyline       | 0.0227       |
| 26 | app           | 0.0115       | intercom    | 0.0218       | lined         | 0.0226       |
| 27 | years         | 0.0114       | income      | 0.0217       | desk          | 0.0226       |
| 28 | rates         | 0.0114       | landlord    | 0.0213       | wine          | 0.0225       |
| 29 | metro         | 0.0111       | block       | 0.0210       | blocks        | 0.0223       |
| 30 | exciting      | 0.0111       | bus         | 0.0209       | classes       | 0.0219       |
| 31 | entrances     | 0.0111       | sewer       | 0.0207       | yoga          | 0.0216       |
| 32 | choice        | 0.0111       | field       | 0.0207       | clubroom      | 0.0215       |
| 33 | br            | 0.0109       | medical     | 0.0206       | urban         | 0.0214       |
| 34 | basement      | 0.0109       | street      | 0.0206       | neighborhoods | 0.0212       |
| 35 | alarm         | 0.0109       | porch       | 0.0205       | showers       | 0.0212       |
| 36 | must          | 0.0109       | stadium     | 0.0204       | charm         | 0.0209       |
| 37 | townhomes     | 0.0107       | building    | 0.0203       | quartz        | 0.0209       |
| 38 | connections   | 0.0107       | de          | 0.0202       | charging      | 0.0204       |
| 39 | extraordinary | 0.0107       | painted     | 0.0199       | racks         | 0.0204       |
| 40 | rear          | 0.0106       | skyline     | 0.0199       | lines         | 0.0199       |
| 41 | university    | 0.0106       | roof        | 0.0196       | building      | 0.0193       |
| 42 | background    | 0.0104       | br          | 0.0195       | steps         | 0.0191       |
| 43 | mini          | 0.0102       | affordable  | 0.0193       | sky           | 0.0190       |
| 44 | historic      | 0.0101       | college     | 0.0193       | dry           | 0.0188       |
| 45 | care          | 0.0099       | pay         | 0.0191       | conference    | 0.0188       |
| 46 | anytime       | 0.0099       | st          | 0.0189       | shops         | 0.0187       |
| 47 | pointe        | 0.0099       | electricity | 0.0188       | starbucks     | 0.0185       |
| 48 | largest       | 0.0097       | pays        | 0.0186       | deep          | 0.0185       |
| 49 | portal        | 0.0097       | line        | 0.0185       | glass         | 0.0182       |
| 50 | duplex        | 0.0096       | lines       | 0.0185       | stadium       | 0.0181       |

## **D-2 MNIR with Different Preprocessing**

In this section, we demonstrate that our MNIR results are robust to our preprocessing procedures. We use 1% as a threshold for removing low frequency words in the MNIR model in the main text. Here, we report the MNIR result from a different threshold: 0.7%. We remove words that appear less than 0.7% of the documents. Given we have 1,696,499 documents, the word needs to appear at least in 11,875 documents to not be removed.

### Higher % Black

wall-to-wall  
stubs  
budget  
mills  
priced  
evictions  
section  
eat-in  
renoted  
scious  
applition  
secuty  
renovations  
polis  
hook-ups  
applicants  
order  
suburban  
qualify  
recent  
de  
discounts  
exposed  
bedroo  
posit  
hookup  
brick  
affordable  
perfectly  
train  
broad  
handicap  
criminal  
proof  
ups  
hospital  
military  
artnts  
app  
metro  
hook  
livg  
confirm  
years  
rates  
exciting  
money  
interstates  
porch  
choice

### Higher % Poverty

campus  
student  
students  
exposed  
university  
evictions  
lofts  
museum  
section  
historic  
august  
stubs  
midtown  
de  
studios  
proof  
duplex  
brick  
hospitals  
secured  
hollywood  
ave  
shuttle  
off-street  
sky  
recent  
study  
original  
criminal  
renoted  
hook  
showings  
sewage  
arts  
intercom  
recently  
needed  
applicants  
block  
music  
income  
skyline  
landlord  
stadium  
eat  
medical  
bus  
secuty  
sewer  
roommate

### Higher % College

floor-to-ceiling  
foods  
trader  
capitol  
rooftop  
triangle  
concierge  
uptown  
lobby  
facing  
panoramic  
bicycle  
midtown  
boutique  
union  
cafes  
whole  
actual  
marble  
queen  
broker  
tower  
subway  
nw  
joe  
trendy  
elevator  
museum  
nightlife  
backsplashes  
smoke-free  
red  
hill  
streets  
bike  
capital  
highlands  
underground  
desk  
blocks  
repair  
shuttle  
wine  
skyline  
classes  
urban  
broad  
walkable  
yoga  
santa

Figure A7: Words with Top 50 Correlation with Neighborhood Covariates



### D-3 MNIR Results for Different SES Covariates

In this section, we present MNIR results with different covariates. We run MNIR with census tract median household income and % White. The first column lists the top 50 words that are strongly associated with higher median household income. The top 50 words show that advertisements in neighborhoods with higher median household income tend to have words that emphasize housing and neighborhood amenities. For example, words such as ‘whole,’ ‘foods,’ ‘metro,’ ‘yoga,’ ‘starbucks’ describe neighborhood amenities. Words that describe higher-end housing unit amenities ‘marble,’ ‘concierge,’ ‘whirlpool,’ ‘high-end,’ ‘sinks,’ ‘quartz,’ ‘showers,’ are more likely to appear as the neighborhood median household income increases.

The next column displays the top 50 words that are likely to appear when listings are in neighborhoods with lower median household income. Similar to the results from % Black (presented in the main text), words that emphasize renter qualifications such as ‘evictions,’ ‘section’ (8), ‘criminal,’ ‘background,’ ‘screened,’ ‘income,’ ‘application,’ ‘money,’ ‘must’ are more likely to appear as the neighborhood median household income decreases. There are a few words that describe the unit and the neighborhood. For example, ‘historic’ and ‘hospital’ are likely to describe the neighborhood. But the number of words describing neighborhood amenities are more limited compare to the first column. Words such as ‘hookup,’ ‘lofts,’ ‘porch,’ ‘painted,’ ‘intercom’ describe housing amenities that are not high-end features.

The results for % White (presented in the third column of Figure A8) show a less obvious pattern than other covariates. They includes word that describe neighborhood amenities (‘whole,’ ‘foods,’ ‘theatre’) and unit amenities (‘whirlpool,’ ‘lawn,’ ‘carports’). However, these words appear less frequently. They are also more likely to represent high-end neighborhood and unit amenities.

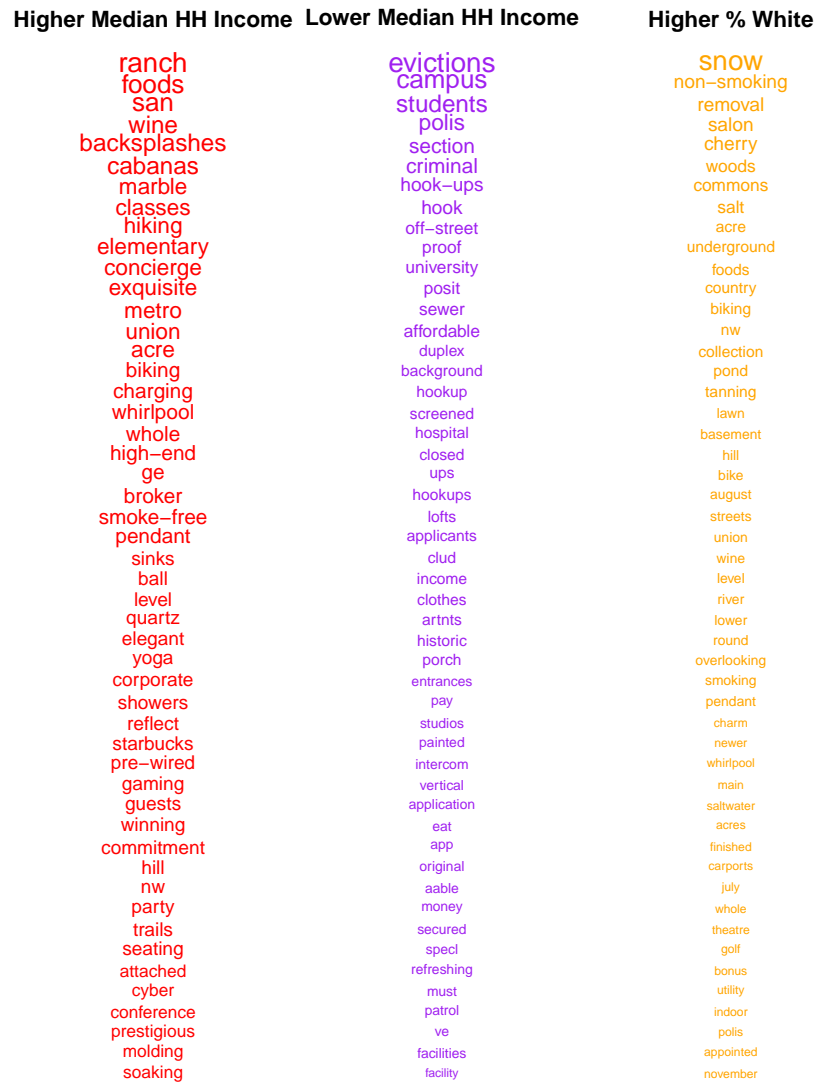

Figure A8: Words with Top 50 Correlation with Neighborhood Covariates

## E. Supplemental Analysis

### E-1 Variation in Amount and Types of Information

In supplemental analyses we examine non-text forms of information inequality. We created three simple measures based on our Craigslist data: (1) general information is a count of the number of distinct (optional) information fields that have been filled out in each post, including the number of bedrooms, bathrooms, and square footage, as well as contact information and the exact listing address; (2) number of pictures is a count of the number of pictures posted with the advertisement; and, (3) number of words is a count of the total number of words in the main text body of each advertisement. While these measures do not tell us anything about the content of advertisements, they offer initial, simple indicators of information differences (see Boeing et al. 2020 for similar analyses). Additionally, these measures capture important dimensions of advertisements that can impact the housing search process. For example, Craigslist allows prospective renters to filter which posts are shown to them based on these information categories; e.g., one can select to only be shown postings that contain pictures, or that have two or more bedrooms. We use a similar modeling approach here as with our topic proportions in the main text.

#### RESULTS

Table A22 reports descriptive statistics for our numerical (non-text) data. On average, advertisements contain 3.7 distinct fields of information, but range as low as 0 and as high as 5. We see wider ranges in the number of pictures (ranging from 0 to 24, with an average of 9) and overall word count (ranging from 6 – 3,782 words, with an average of about 183 words). Table A22 also reports descriptive statistics for all of our independent variables, which we draw from the ACS.<sup>1</sup>

---

<sup>1</sup>The sample size for information regressions and topic model regressions differ because there are plenty of listings that do not have enough text for topic modeling. There are 1,457 listings that have less than 5 English words in their text; in addition, because our text preprocessing procedures remove very low frequency and very high frequency words, we drop additional listings that do not have enough text after preprocessing.

Table A22: Descriptive Statistics

| Statistic                              | N         | Mean   | St. Dev. | Min   | Pctl(25) | Pctl(75) | Max     | Missing |
|----------------------------------------|-----------|--------|----------|-------|----------|----------|---------|---------|
| <b>Dependent Variables<sup>a</sup></b> |           |        |          |       |          |          |         |         |
| General Information                    | 1,693,890 | 3.74   | 0.99     | 0     | 3        | 4        | 5       | 0       |
| Number of Pictures                     | 1,693,890 | 9.02   | 5.96     | 0     | 5        | 12       | 24      | 4       |
| Number of Words                        | 1,693,890 | 182.57 | 115.04   | 6     | 99       | 244      | 3,782   | 0       |
| <b>Neighborhood Type<sup>b</sup></b>   |           |        |          |       |          |          |         |         |
| White Non-Poor                         | 1,179,452 | 69.2   |          |       |          |          |         |         |
| White Poor                             | 78,610    | 4.6    |          |       |          |          |         |         |
| Black Non-Poor                         | 136,747   | 8.1    |          |       |          |          |         |         |
| Black Poor                             | 75,942    | 4.4    |          |       |          |          |         |         |
| Latino Non-Poor                        | 141,015   | 8.3    |          |       |          |          |         |         |
| Latino Poor                            | 49,535    | 2.9    |          |       |          |          |         |         |
| Asian Non-Poor                         | 28,892    | 1.7    |          |       |          |          |         |         |
| Asian Poor                             | 3,697     | 0.2    |          |       |          |          |         |         |
| <b>Unit Covariate<sup>a</sup></b>      |           |        |          |       |          |          |         |         |
| Price (\$1,000)                        | 1,693,890 | 1.42   | 0.80     | 0.001 | 0.91     | 1.70     | 10.00   | 18,604  |
| <b>Tract Covariates<sup>b</sup></b>    |           |        |          |       |          |          |         |         |
| % College                              | 1,693,890 | 41.14  | 21.42    | 0.00  | 23.01    | 58.06    | 100.00  | 2,500   |
| % Foreign Born                         | 1,693,890 | 16.42  | 12.72    | 0.00  | 6.83     | 22.80    | 100.00  | 2,499   |
| % Units Renter Occupied                | 1,693,890 | 52.82  | 23.72    | 0.00  | 34.72    | 71.06    | 100.00  | 3,250   |
| % Units Built Post 2010                | 1,693,890 | 3.15   | 5.18     | 0     | 0        | 4.0      | 88.00   | 3,250   |
| % Vacancy                              | 1,693,890 | 10.104 | 7.62     | 0.00  | 5.09     | 13.03    | 95.77   | 3,202   |
| <b>Variables for MNIR<sup>b</sup></b>  |           |        |          |       |          |          |         |         |
| % Black                                | 1,693,890 | 17.134 | 21.263   | 0.000 | 3.200    | 21.500   | 100.000 | 2,499   |
| % College                              | 1,693,890 | 41.136 | 21.424   | 0.000 | 23.010   | 58.060   | 100.000 | 2,500   |
| Poverty Rate                           | 1,693,890 | 16.161 | 11.915   | 0.000 | 7.370    | 21.910   | 100.000 | 3,224   |

<sup>a</sup> Source: Craigslist

<sup>b</sup> Source: 2016 American Community Survey 5-year pooled data

Clearly, there is wide variation in the amount of information included in Craigslist rental housing advertisements. To explore this variation, we estimate an OLS model regressing each outcome on neighborhood type, testing whether there is systematic variation across different types of neighborhoods. We then estimate pairwise difference across neighborhood types by changing the baseline category in our regression models and generating predicted values. Figure A9 reports pairwise comparisons of neighborhood types for each of our information outcomes.

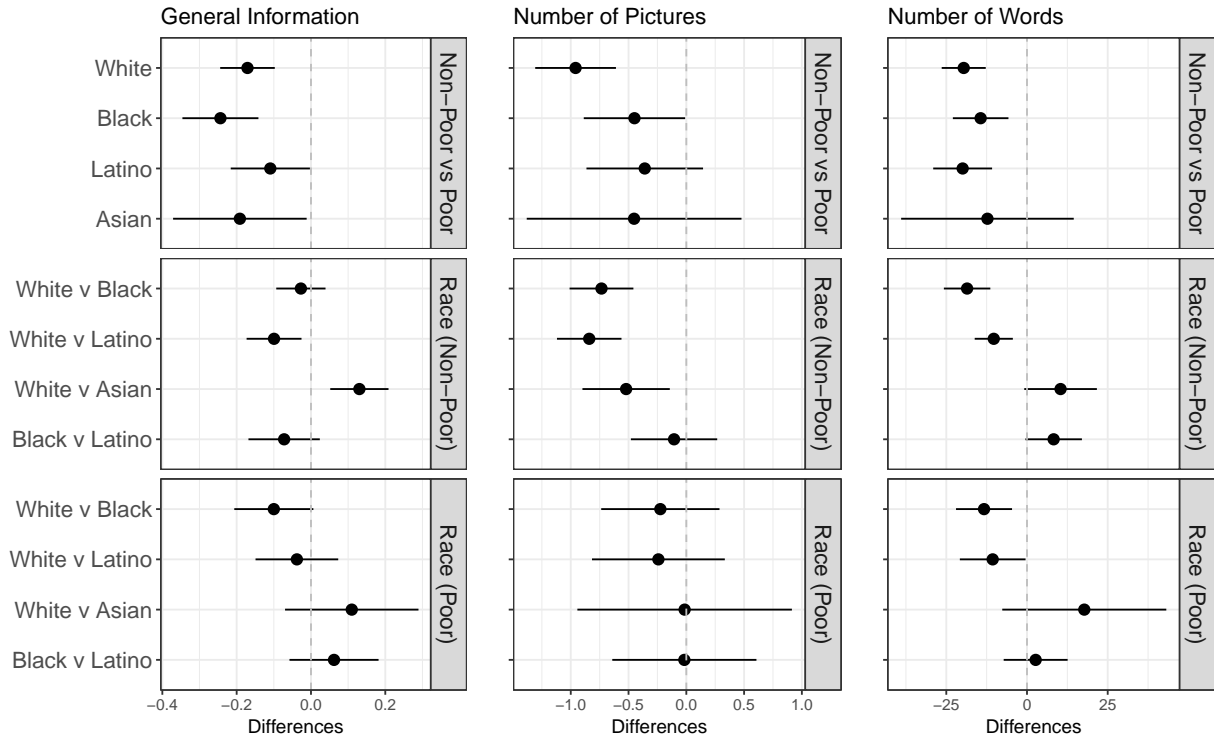

Figure A9: Pairwise Comparison of Information Outcomes Across Neighborhood Types

*Note:* The dots and bars indicate the regression coefficients and confidence intervals from regression models. The neighborhood written first (before “vs”) is the base category. The first four rows (non-poor vs poor) display the regression coefficients for poor neighborhoods when the non-poor neighborhoods for the respective racial group is the base category. Negative value means poor neighborhoods have less information than non-poor neighborhoods. Positive value means non-poor neighborhoods have less information than poor neighborhoods. The following eight rows compare differences between different racial compositions. The first racial group is the base category. For example, the coefficient for “White v Latino” in the sixth row for the number of pictures indicates that Latino non-poor neighborhoods have 0.84 less pictures than White non-poor neighborhoods. Neighborhood racial composition and poverty rate are obtained from 2016 ACS 5-year pooled data. The regression models include MSA fixed effects. Standard errors are clustered at census tract level.

Figure A9 focuses on theoretically important comparisons across neighborhood types by plotting the differences in each outcome for given pairs of neighborhoods. Starting with the top panel for each outcome measure, we can see a clear pattern across outcomes: listings in poor neighborhoods tend to contain significantly less information than their same-race, non-poor counterparts. The magnitude and significance of

these information gaps varies somewhat across our information measures, but it is clear that holding racial composition constant, advertisements in poorer neighborhoods provide far less information to searchers.

However, poverty status does not account for all the variation in information levels. The middle panel for each outcome compares information differences among non-poor neighborhoods by race. Across measures we consistently find that listings in non-poor Black and Latino neighborhoods contain less information than those in non-poor White neighborhoods. In other words, even when we just compare neighborhoods with similarly low poverty levels, Black and Latino neighborhoods face an information disadvantage compared to White neighborhoods. Advertisements for housing in non-poor Asian neighborhoods contain more overall information and number of words compared to those in non-poor White neighborhoods, but fewer pictures on average, suggesting that listings in Asian neighborhoods do not experience the same racial penalty as Black and Latino neighborhoods. Nevertheless, we find clear evidence of both a socioeconomic and racial hierarchy in terms of basic information: advertisements in neighborhoods with more Black and/or Latino residents and/or more poor households contain significantly less information—measured as the number of distinct information fields, the number of pictures, and the number of overall words provided within advertisements—than do advertisements in neighborhoods with more Asian, White, and/or non-poor residents.

Finally, the bottom panel in Figure A9 measures racial differences in listing information levels among poor neighborhoods. Even among poor neighborhoods we find some evidence of racial inequality: listings in poor Black and Latino neighborhoods have significantly fewer words than those in poor White neighborhoods. While racial differences among poor neighborhoods tend to be smaller in terms of magnitude and are not statistically significant across all outcome measures, they nevertheless underscore the importance of accounting for neighborhood race and poverty status simultaneously to fully understand differences in access to information.

Table A23 repeats our analysis but includes additional neighborhood covariates. We find that higher priced listings tend to contain more information on average, as do listings in neighborhoods with greater proportions of college-educated residents or immigrants. Interestingly, we also find that measures of stronger rental market competition (rental occupancy rate and an indicator of recent construction activity) are also associated with greater information, while higher vacancy rates—an indicator of a weaker rental market—are associated with less information. Searchers who are limited to looking in less desirable neighborhoods have access to far less information about their potential homes.

Overall, our supplementary analyses find clear evidence of neighborhood racial and socioeconomic inequalities in the amount of information presented in rental housing advertisements. These results offer further support for the conclusions we draw using the text data about racial and socioeconomic inequality in the information provided in housing advertisements.

Table A23: Regression Results Predicting Information Measures with Additional Neighborhood Covariates

|                                         | <i>Dependent variable:</i> |                     |                      |
|-----------------------------------------|----------------------------|---------------------|----------------------|
|                                         | General Information        | Num Pics            | Num Words            |
| <b>Neighborhood Type</b>                |                            |                     |                      |
| White Poor                              | -0.194**<br>(0.037)        | -1.008**<br>(0.176) | -24.444**<br>(3.644) |
| Black Non-poor                          | 0.016<br>(0.035)           | -0.179<br>(0.135)   | -10.079**<br>(3.737) |
| Black Poor                              | -0.171**<br>(0.045)        | -0.503*<br>(0.208)  | -20.563**<br>(3.536) |
| Latino Non-poor                         | -0.151**<br>(0.042)        | -0.427**<br>(0.156) | -8.637*<br>(3.554)   |
| Latino Poor                             | -0.255**<br>(0.047)        | -0.668**<br>(0.237) | -27.832**<br>(4.648) |
| Asian Non-poor                          | 0.006<br>(0.048)           | -0.635**<br>(0.215) | -1.596<br>(6.202)    |
| Asian Poor                              | -0.190*<br>(0.079)         | -1.283**<br>(0.420) | -14.516<br>(11.739)  |
| <b>Unit and Neighborhood Covariates</b> |                            |                     |                      |
| Price (\$1000)                          | 0.182**<br>(0.009)         | 1.956**<br>(0.053)  | 16.301**<br>(0.931)  |
| % College                               | 0.0002<br>(0.0005)         | 0.007**<br>(0.002)  | 0.269**<br>(0.052)   |
| % Foreign Born                          | 0.005**<br>(0.001)         | 0.010*<br>(0.004)   | 0.398**<br>(0.109)   |
| % Units Renter Occ                      | 0.003**<br>(0.0004)        | 0.012**<br>(0.002)  | 0.357**<br>(0.044)   |
| % Unit Built after 2010                 | 0.004**<br>(0.001)         | 0.014*<br>(0.007)   | 1.218**<br>(0.177)   |
| % Vacancy                               | -0.011**<br>(0.001)        | -0.026**<br>(0.005) | -0.791**<br>(0.117)  |
| MSA Fixed Effects                       | Y                          | Y                   | Y                    |
| Observations                            | 1,693,890                  | 1,693,890           | 1,693,890            |
| Number of Census Tracts                 | 37,392                     | 37,392              | 37,392               |
| R <sup>2</sup>                          | 0.107                      | 0.088               | 0.110                |
| Adjusted R <sup>2</sup>                 | 0.107                      | 0.088               | 0.110                |
| Residual Std. Error                     | 0.932                      | 5.693               | 108.556              |

+p<0.1; \*p<0.05; \*\*p<0.01

*Note:* The base category for neighborhood type is White non-poor neighborhoods. Listings that are more expensive than \$10,000 are removed. For neighborhood classification, racial composition is based on the plurality racial group. We use a threshold of 30% of tract poverty rate as our measure of neighborhood poverty. Neighborhood covariates are obtained from 2016 ACS 5-year pooled data. Standard errors are clustered at census tract level.

## F. Appendix References

- Boeing, Geoff, Max Besbris, Ariela Schachter, and John Kuk. 2020. "Housing Search in the Age of Big Data: Smarter Cities or the Same Old Blind Spots?" *Housing Policy Debate*, DOI: 10.1080/10511482.2019.1684336.
- Chipman, Jonathan, Richard Wright, Steven Holloway, and Mark Ellis. 2015. *Mixed Metros and Segregation in the USA*, Third Edition. Online at [www.mixedmetro.us](http://www.mixedmetro.us).
- Holloway, Steven, Richard Wright, and Mark Ellis. 2012. "The Racially Fragmented City? Neighborhood Segregation and Diversity Jointly Considered." *The Professional Geographer* 64(1): 1-20.
- Roberts, Margaret E., Brandon M. Stewart, Dustin Tingley, Christopher Lucas, Jetson Leder-Luis, Shana Kushner Gadarian, Bethany Albertson, and David G. Rand. 2014. "Structural Topic Models for Open-Ended Survey Responses." *American Journal of Political Science* 58(4): 1064-1082.
